## **The *GBA* variant E326K is associated with alpha-synuclein aggregation and lipid droplet accumulation in human cell lines.**

Laura. J. Smith<sup>1,2</sup>, Magdalena. M. Bolsinger<sup>1,3</sup>, Kai-Yin. Chau<sup>1,2</sup>, Matthew. E. Gegg<sup>1,2</sup>, Anthony. H. V. Schapira<sup>1,2\*</sup>.

- 1 Department of Clinical and Movement Neurosciences, UCL Queen Square Institute of Neurology, University College London, London, WC1N 3BG.
- 2 Aligning Science Across Parkinson's (ASAP) Collaborative Research Network, Chevy Chase, MD, 20815.
- 3 Division of Medicine, Friedrich-Alexander University Erlangen-Nurnberg, Schloßplatz 4, 91054 Erlangen, Germany.

\* Corresponding author contact: [a.schapira@ucl.ac.uk](mailto:a.schapira@ucl.ac.uk); 020 7830 2012 (Ex: +442080168166).

## Abstract

Sequence variants or mutations in the *GBA* gene are numerically the most important risk factor for Parkinson disease (PD). The *GBA* gene encodes for the lysosomal hydrolase enzyme, glucocerebrosidase (GCase). *GBA* mutations often reduce GCase activity and lead to impairment of the autophagy-lysosomal pathway, which is important in the turnover of alpha-synuclein, accumulation of which is a key pathological hallmark of PD. Although the E326K variant is one of the most common *GBA* variants associated with PD, there is limited understanding of its biochemical effects. We have characterised homozygous and heterozygous E326K variants in human fibroblasts. We found that E326K variants did not cause significant loss of GCase protein or activity, endoplasmic reticulum (ER) retention or ER stress, in contrast to the L444P *GBA* mutation. This was confirmed in human dopaminergic SH-SY5Y neuroblastoma cell lines over-expressing GCase with either E326K or L444P protein. Despite no loss of GCase activity, a significant increase of insoluble alpha-synuclein aggregates in E326K and L444P mutants was observed. Notably, SH-SY5Y over-expressing E326K demonstrated a significant increase in lipid droplet number under basal conditions, which was exacerbated following treatment with the fatty acid oleic acid. Similarly, a significant increase in lipid droplet formation following lipid loading was observed in heterozygous and homozygous E326K fibroblasts. In conclusion, the work presented here demonstrates that the E326K mutation behaves differently to common loss of function *GBA* mutations, however lipid dyshomeostasis and alpha-synuclein pathology is still evident.

## Introduction

Mutations or genetic variants in the *GBA* gene (OMIM 606463) are numerically the most important genetic risk factor for Parkinson disease (PD), increasing the prevalence by 5-30-fold depending on the mutation, age and ethnicity (1-5). *GBA* mutation-associated PD (*GBA*-PD) leads to an earlier age of onset and increased cognitive impairment (6-8), with alpha-synuclein pathology similar to that of sporadic PD (6, 9). The *GBA* gene encodes for the lysosomal hydrolase enzyme, glucocerebrosidase (GCase), which catalyses the catabolism of the sphingolipids glucosylceramide (GlcCer) and glucosylsphingosine (GlcSph). Homozygous or bi-allelic *GBA* mutations result in the lysosomal storage disorder Gaucher disease (GD).

Mutations in *GBA* are associated with a specific reduction in GCase activity in the brain (10). The degree of pathogenicity associated with each individual *GBA* mutation differs and variants have been stratified into mild (e.g. N370S) or severe variants (e.g. L444P) (11-13).

*GBA* polymorphic variants like E326K are referred to as risk variants as they do not cause GD when bi-allelic, yet increase the risk for developing PD in both homozygous and heterozygous form (14-16). E326K is one of the most prevalent *GBA* variants in PD patients (17-19) and has been associated with accelerated development of dementia and aggressive motor symptoms (20-22). However, the mechanisms underlying how E326K variants lead to an increased predisposition for PD remain unclear.

The exact mechanisms underpinning the relationship between *GBA* mutations and alpha-synuclein pathology, and how this predisposes some patients to PD, remain elusive. A plethora of models of *GBA*-PD have reported alpha-synuclein pathology

(23-28). In cell and animal models of *GBA* mutations activation of the unfolded protein response (UPR) (24, 29-31) and impairment of the autophagy-lysosome pathway (ALP) (23, 24, 32-34) have been demonstrated. In a human neural crest stem-cell derived dopaminergic neuron model of *GBA* mutations, reduced GCCase function was accompanied by increased alpha-synuclein levels and could be rescued with the GCCase small molecule chaperone ambroxol (28). *GBA* mutations have also been linked to altered lipid metabolism in cell and animal models (23, 27, 35-41), with specific species promoting alpha-synuclein aggregation (42-44). Altered lipid profiles have also been reported in the serum of *GBA*-PD patients (45).

The aim of the present study was to first investigate the effect of the E326K variant on the activity and cellular localisation of GCCase in fibroblast cells from patients with homozygous and heterozygous E326K mutations. Fibroblasts homozygous for L444P and N370S were utilised as examples of pathogenic *GBA* mutations of the type that can cause GD. The results revealed that the E326K variant is not associated with a significant loss of GCCase activity or protein, unlike L444P and N370S, and does not undergo significant ER-trapping or activate the UPR. These findings were confirmed in SH-SY5Y cells expressing E326K, L444P and N370S GCCase protein. Despite no loss of GCCase activity or activation of the UPR, an accumulation of insoluble alpha-synuclein aggregates was observed in E326K SH-SY5Y cells. A significant elevation in the number of lipid droplets was also demonstrated in fibroblast and SH-SY5Y cells harbouring the E326K variant.

## Results

### **No significant reduction in GCCase protein levels in E326K mutant fibroblasts**

GCCase protein level was assessed in fibroblasts by western blot (Figure 1A). In this paper, all results were pooled for genotype. GCCase protein and mRNA levels were not significantly different between control and E326K/WT and E326K/E326K lines. In fibroblast lines with homozygous L444P mutations GCCase protein was 2.8% of control ( $p < 0.01$ ) and in fibroblasts with homozygous N370S mutations, GCCase protein was 17.5% of control ( $p < 0.01$ ). There was no difference in GCCase protein levels in young (mean age 9 years) versus older (mean age 61 years) controls (Figure 1B). L444P/L444P fibroblasts exhibited negligible GCCase protein levels compared to both.

### **No significant reduction in GCCase enzymatic activity in E326K mutant fibroblasts**

Total cell GCCase activity was measured at pH 5.4 and revealed no significant changes between controls and E326K/WT (99% of control) and E326K/E326K (65.5% of control) (Figure 1C). A similar pattern was observed at pH 4.5, with E326K/WT cells having 76.6% of control activity and E326K/E326K cells having 82.1% of control activity (Figure. 1D). Both L444P and N370S cells had significantly reduced GCCase activity at pH 5.4 ( $p < 0.0001$ ) and pH 4.5 ( $p < 0.0001$ ), compared to controls. Again, results were confirmed in age-matched controls (Figure 1E-1F).

### **No significant change in lysosomal content and function in E326K mutant fibroblasts**

The overall endo-lysosomal content of fibroblasts was measured by western blot analysis with the lysosomal marker lysosomal-associated membrane protein 1 (LAMP1) (Figure 2A.). No significant alterations were observed between the cell lines. No changes were observed in young and old controls (Figure 2B).

To investigate overall lysosomal function, enzyme activity assays were performed to measure the activity of two other lysosomal hydrolases,  $\beta$ -galactosidase and  $\beta$ -hexosaminidase (Figure 2C-3F). No significant changes were observed between control lines and mutant fibroblasts. Analysis in age-matched controls revealed no significant alterations between aged and young controls.

### **No significant ER retention of GCCase in E326K mutant fibroblasts**

The different glycosylation patterns of GCCase, as it passes through the secretory pathway, can be utilised to assess the proportion of GCCase that is trapped in the ER. ER-retained forms of GCCase carry N-linked glycans that are sensitive to cleavage by Endo-H, producing lower molecular bands on western blot. The GCCase protein resolves as 3 bands after treatment, with the lower exposure blot showing two higher molecular weight bands likely to be mature protein (Figure 3A). For analysis, wild-type fibroblasts were digested by PNGase F as a positive control for unglycosylated GCCase ( $\Delta$  symbol on blot). The corresponding ER-resident bands in the mutant cell lines are marked with a black asterisk. This band is absent in wild-type cell lines. To quantify the retention of mutant GCCase protein, the density of the ER-resident band was divided by the density of the two mature GCCase bands (Figure 3B). Compared to controls, L444P/L444P fibroblasts were the only cells to exhibit an increase in Endo-H sensitive GCCase fraction (5.28-fold) ( $p < 0.01$ ).

To further investigate GCCase trafficking, lysosomal GCCase activity was measured using a substrate that is taken up only in to acidic vesicles and fluoresces upon catalysis with GCCase (46). Lysosomal GCCase activity was measured in E326K/+, E326K/E326K and L444P/L444P fibroblasts (Supplemental Figure 1). After loading of substrate, there is a linear increase in fluorescent product up to 45 minutes, after which GCCase enzymatic activity plateaus. This plateau is the depletion/release of substrate

from late endosomes and lysosomes over time. Therefore, the initial linear rate of enzyme activity was calculated between time 0 and time 45 minutes. Lysosomal GCCase activity was abolished in wild-type fibroblast cells pre-treated with 10  $\mu$ M CBE for 24 hours, a GCCase specific inhibitor, and was similar to lysosomal GCCase activity in L444P/L444P fibroblasts. In comparison, E326K/WT and E326K/E326K fibroblasts have activity in the lysosome closer to that of controls, suggesting this variant behaves differently to the L444P loss of function variant.

### **No significant ER stress in E326K mutant fibroblasts**

To assess UPR activation in fibroblasts, BiP chaperone protein levels were measured (Figure 3C). BiP (GRP78) is a central regulator of the UPR, binding to unfolded proteins in the ER and activating the three arms of the UPR. Expression levels can also be increased during ER stress (47). No significant changes were observed in any mutant lines compared to healthy controls.

Analysis of *CHOP* mRNA expression, which is up-regulated in response to prolonged activation of the UPR following binding of BiP to the PERK arm of the UPR (48) revealed a 4.75-fold increase in L444P/L444P fibroblasts ( $p < 0.05$ ) (Figure 3D). No significant increases were observed in E326K or N370S fibroblasts compared to controls.

### **Characterisation of GCCase protein level, expression and activity in SH-SY5Y cell lines expressing GCCase mutants**

SH-SY5Y stable cell lines expressing wild-type, E326K, L444P and N370S *GBA* constructs were generated and data from two clones pooled for each genotype. Over-expression of *GBA* was confirmed via qPCR (Figure 4A). Wild-type (288-fold), E326K

(190-fold), L444P (209-fold) and N370S (125-fold) lines all expressed similar higher levels of GCCase mRNA, when compared to untransfected cells.

Compared to untransfected SH-SY5Y cells, all GCCase over-expressing lines had higher GCCase protein levels and activity ( $p < 0.05$ - $p < 0.0001$ ) (Figure 4B-4D). No significant changes in GCCase protein level or activity were observed between wild-type and E326K cells. Cells expressing L444P mutant protein had lower GCCase protein levels (55.4% of wild-type) ( $p < 0.05$ ) and activity (45.5% of wild-type) ( $p < 0.05$ ) compared to wild-type. In N370S cells, GCCase protein level was not significantly reduced unlike activity, which, but activity was 33.6% of wild-type ( $p < 0.01$ ).

#### **Overall lysosomal content and function unaltered by GCCase mutations in undifferentiated SH-SY5Y cells**

No significant changes were observed in activity of the lysosomal hydrolases,  $\beta$ -galactosidase and  $\beta$ -Hexosaminidase, and protein level of LAMP1 across SH-SY5Y cell lines (Figure 4E-4H). These data indicate that *GBA* mutations do not influence the overall endolysosomal content in SH-SY5Y cells.

#### **Increased ER stress in undifferentiated SH-SY5Y cells over-expressing L444P mutant GCCase**

Activation of the UPR in SH-SY5Y cells was investigated by measuring BiP protein levels. Compared to wild-type, cells expressing L444P GCCase protein were the only *GBA* lines that exhibited a significant elevation in BiP levels ( $p < 0.05$ ) (Figure. 4I-4J). This was also significantly higher than E326K ( $p < 0.01$ ) and N370S ( $p < 0.05$ ) lines. As a control, cells over-expressing green fluorescent protein, which has a similar size to GCCase, was also not found to increase BiP levels. Note that *CHOP* mRNA levels in SH-SY5Y were extremely low ( $> 30$  cycles) and could not be measured reliably.



### **Increased soluble intracellular alpha-synuclein protein level in undifferentiated SH-SY5Y cells over-expressing L444P mutant GCase**

Accumulation of alpha-synuclein monomers in cells is a key feature in models of *GBA*-PD (23, 26, 33, 34, 39, 46, 49). Analysis of Triton X-100 soluble, monomeric alpha-synuclein revealed no significant changes in E326K and N370S cells compared to wild-type (Figure 5A-5B), while those expressing the L444P variant exhibited a 2.58-fold increase ( $p < 0.05$ ). There were no significant changes in *SNCA* mRNA expression observed between cell lines (Figure 5C).

### **Increased insoluble alpha-synuclein protein level in undifferentiated SH-SY5Y cells over-expressing mutant GCase protein**

As alpha-synuclein can form insoluble, phosphorylated aggregates (50), the effect of *GBA* mutations on alpha-synuclein aggregates in the Triton X-100 insoluble fraction was investigated. Soluble and insoluble Triton X-100 fractions were run on the same western blot and immunoblotted for alpha-synuclein (Figure. 5D-5H). The vast majority of alpha-synuclein remained in the soluble fraction. Monomeric, soluble alpha-synuclein was a single band at the expected molecular weight of 15 kDa. No significant changes in soluble alpha-synuclein monomers were observed.

There was evidence of a HMW alpha-synuclein species in the insoluble fraction (75 kDa), which was absent in human *SNCA* knock-out HAP1 lines (Figure. 5E). Insoluble alpha-synuclein band density was expressed as a ratio against soluble  $\beta$ -actin (Figure. 5H). As expected in the insoluble fraction,  $\beta$ -actin band density was lower than the soluble fraction and likely represents  $\beta$ -actin associated with Triton X insoluble membranes (e.g., lipid rafts) There was a concurrent and significant increase in E326K (2.88-fold) and L444P (2.91-fold) cells compared to wild-type ( $p < 0.05$ ), indicative of an accumulation of insoluble alpha-synuclein aggregates.

## Increased number of lipid droplets in E326K mutant cell lines

As *GBA* mutations have been associated with altered lipid metabolism (51-53), lipid droplet accumulation was measured in our cell lines. Lipid droplets are organelles involved in intracellular lipid homeostasis (54). BODIPY 493/503 stains neutral lipids and lipid droplets are visualised as punctate structures, examples of which are shown by arrows (Figure. 6). The number of lipid droplets were quantified using Image J and normalised to cell area. To further analyse the effect of *GBA* mutations on lipid droplet accumulation, SH-SY5Y cells were grown under basal conditions and stained with BODIPY 493/503 (Figure. 6D-6E). In these conditions, a higher number of lipid droplets was observed in mutants compared to wild-type, significantly elevated in E326K (2.1-fold) ( $p < 0.0001$ ;  $n=3$ ) and L444P (1.8-fold) ( $p < 0.0001$ ). Both were significantly higher compared to N370S expressing lines (E326K  $p < 0.0001$  and L444P  $p < 0.01$ ). The number of lipid droplets in untransfected cells was significantly lower than all over-expressing cell lines (wildtype  $p < 0.05$ ; E326K, L444P and N370S  $p < 0.0001$ ). However, SH-SY5Y cells over-expressing GFP were not significantly different to untransfected cells, suggesting this increase in lipid droplet number is not simply an artefact of protein over-expression.

To investigate if the increased LD number in *GBA* mutant cells was due to increased rate of lipid droplet formation, SH-SY5Y cells were starved overnight in OptiMEM and then treated with the fatty acid oleic acid for 5 hours to induce lipid droplet formation (55) (Figure 6F-6G). A 5.1-fold increase in lipid droplet formation was observed in E326K cells compared to wild-type cells ( $p < 0.0001$ ). In SH-SY5Y cell lines expressing L444P GCCase protein a 1.77-fold increase in lipid droplets, compared to wild-type, was observed ( $p < 0.05$ ). Lipid droplet formation in E326K cells was significantly higher than in L444P ( $p < 0.0001$ ), N370S ( $p < 0.0001$ ) and GFP ( $p < 0.0001$ ) lines. Both E326K and

L444P were significantly higher than untransfected (E326K  $p < 0.0001$  and L444P  $p < 0.001$ ).

To confirm the role of E326K in LD formation, fibroblast lines heterozygous and homozygous for E326K were starved overnight, loaded with oleic acid and lipid droplet formation quantified (Figure 6A-6C). Compared to control cells, E326K/WT cells exhibited a 2.11-fold increase in lipid droplet formation following lipid loading with oleic acid ( $p < 0.0001$ ) (Figure 6B). Similarly, following oleic acid treatment, a 6.61-fold increase in lipid droplet formation was observed in E326K/E326K cells compared to controls (Figure 6C).

## Discussion

The results of this study indicate that the E326K variant does not behave in a similar fashion to the pathogenic *GBA* mutations L444P and N370S. Notably, despite no significant loss of E326K GCCase activity, insoluble alpha-synuclein aggregates in SH-SY5Y cells were observed and were coincident with an enhanced formation and accumulation of lipid droplets in SH-SY5Y and fibroblast lines, suggestive of altered lipid homeostasis. A schema highlighting the potential pathways underlying the mechanism of the E326K variant is in Figure 7.

Few studies have biochemically characterised E326K GCCase protein. This study provides evidence that E326K in fibroblasts does not induce a significant loss of GCCase function or result in unfolded protein response, unlike other common pathogenic *GBA*-PD mutations N370S and L444P. In homozygous and heterozygous form, E326K mutations are not associated with a significant loss of GCCase expression or activity in fibroblasts and SH-SY5Y cells. These findings are supported by previous literature demonstrating the E326K variant generally reduces GCCase activity to a

lesser extent than other pathogenic *GBA* mutations (16, 56-61), while L444P and N370S variants are reported to induce a loss of GCCase function (30, 31, 42, 61-67), as demonstrated in this study.

Aberrant trafficking and retention of mutant GCCase in the ER has been reported in a variety of cell models (30, 31, 61, 62, 68-71). Activation of the UPR has been demonstrated extensively in cells harbouring the L444P variant (29, 31, 61, 68, 70, 71). In this study, unlike L444P, the E326K protein is not localised to the ER in fibroblasts and does not activate the UPR, suggesting correct lysosomal trafficking and the absence of a severely misfolded protein. It may be that the mutant E326K protein exerts a gain of function mechanism through a 'moonlighting' function such as the glucosylation of cholesterol at the lysosome (72). The altered properties of glucosylated cholesterol may increase its storage in lipid droplets or influence lipid membrane fluidity, which may promote the aggregation of alpha-synuclein (73). Alterations to the composition of lipid rafts, which are central regulators of CMA (74), may impair CMA-mediated degradation of alpha-synuclein. Furthermore, an increase in cholesterol has been associated with an impairment of autophagy in N370S fibroblasts (67). As ER retention of GCCase is reported to correlate with disease severity (75) and has been shown to be variable among lines harbouring the same N370S genotype (70), this may explain the lack of impaired GCCase localisation in N370S cells in this study.

Evidence suggests a role for *GBA* mutants in the accumulation of alpha-synuclein monomers and aggregates (76). Despite no loss of GCCase activity, SH-SY5Y cells expressing the E326K variant exhibit an increase in insoluble alpha-synuclein aggregates. This was increased to a similar level as L444P mutant cells. As the L444P variant has been shown to accelerate alpha-synuclein pathology and spread in mice

(77, 78), this points toward a potentially similar propagation of pathology in E326K carriers. The observation that the E326K mutation occurs on the GCase protein surface (79), suggests protein interactions may be influenced. It's possible that the E326K mutant GCase protein has a reduced affinity for binding alpha-synuclein, as suggested in the N370S protein (80), which could induce alpha-synuclein lipid binding and aggregation.

Accumulation of insoluble alpha-synuclein aggregates may be explained by the accumulation of lipid droplets in E326K fibroblasts and SH-SY5Y cells, suggestive of altered lipid metabolism. Lipid homeostasis is necessary for maintaining proper function of the neuron and synaptic plasticity. Alterations in such pathways have been reported in PD with increased levels of TAGs, cholesterol and ceramides (81). In an effort to overcome lipid overload, cells initially induce a pathway to store excess lipids in lipid droplets (54). Although suggested to be initially protective (82, 83), excess lipid droplets can be neurotoxic (84). Lipid droplets protect cells from excess fatty acids which can be targeted for lipid peroxidation. During oxidative stress, reactive oxygen species (ROS) can attack free fatty acids and generate toxic lipid peroxides and reactive aldehydes which can exert lipotoxicity including damage to lipid membranes, ER stress, mitochondrial damage and subsequent neurodegeneration (82, 83, 85-88). Excessive lipid droplet formation has however been demonstrated to trigger neurotoxicity (84). It may be this that contributes to neurodegeneration in E326K mutants.

Under normal conditions, the number of lipid droplets accumulating in SH-SY5Y cells expressing E326K and L444P was elevated compared to wild-type cells. Following lipid loading, lipid droplet formation was significantly elevated in these cells compared to wild-type and other mutant lines. The same was observed in heterozygous and

homozygous E326K fibroblasts. Interestingly, although L444P SH-SY5Y cell lines exhibited increase lipid droplets after lipid loading, this was to a much lesser extent than E326K lines. As the E326K variant is not associated with a loss of GCCase function or activation of the UPR, yet the L444P line is, it is likely that these variants induce accumulation of lipid droplets through different pathways. The L444P variant may lead to improper ALP and clearance of lipids, whereas the E326K variant may work through pathways involving the mitochondria and metabolism of lipids.

Many studies demonstrate a correlation between increased lipid droplets and alpha-synuclein pathology (83, 89, 90). Recently, in a mouse model of synucleinopathy, lipid droplet accumulation correlated with alpha-synuclein pathology, both of which were rescued by over-expressing wild-type GCCase (91), reinforcing the role of GCCase in this pathway. Proper regulation of cellular lipids is critical to maintain the composition and fluidity of lipid membranes. Such lipids can bind alpha-synuclein and accelerate its formation into toxic oligomeric and fibrillar species, propagating PD pathology. In addition, alterations in lipid membrane integrity can influence alpha-synuclein binding and enhance the conversion of monomeric alpha-synuclein into toxic aggregates (81). Altered composition of GSLs has been demonstrated in L444P and N370S neurons levels (23, 24, 44), although the accumulation of these lipids in *GBA*-PD is debatable (92, 93). A shift toward short-chain GSLs may be induced by *GBA* mutations which can promote the toxic aggregation of alpha-synuclein (42).

The E326K mutation may influence lipid metabolism, possibly inducing its remodelling toward fatty acid oxidation, priming neurons to more efficiently synthesise or take up fatty acids. Fatty acid oxidation occurs in the mitochondria (94) and a defective mitochondrial network may contribute to E326K pathogenesis (95). Mitochondrial dysfunction has long been implicated in the pathogenesis of PD and associated with

*GBA* mutations (32, 96-98). There may also be a reciprocal relationship between mitochondria and lipid droplets as they may associate and form mitochondria with a unique structure and function less prone to fatty acid oxidation (95).

Understanding the effect of the E326K variant in human midbrain dopamine neurons is an exciting avenue to explore in future work, including the potential role of mitochondria in the mechanism of disease. This may shed light on why the E326K variant contributes to the risk of developing PD, but does not lead to GD.

In conclusion, this study supports the hypothesis that the mechanisms associated with individual *GBA* mutations may be multiple and provides evidence that the E326K mutation does not behave in the same way as common loss of function mutations, L444P and N370S.

## **Materials and Methods**

### **Cell lines**

The majority of human fibroblast cell lines were taken from the Schapira laboratory cell line bank. Participants gave informed consent and the collection of skin biopsies was approved by the Royal Free Research Ethics Committee (REC number 10/H0720/21) and the Great Ormond Street Hospital Ethics Committee. Cell lines GM10905 (Coriell Cat# GM20272, RRID:CVCL\_0R42) and GM20272 (Coriell Cat# GM20272, RRID:CVCL\_0R42) (L444P/L444P) were purchased from Coriell Institute cell repository. ND41016 (Subject ID: NDS00203) (NHCDR Cat# ND41016, RRID:CVCL\_EZ71) (E326K/E326K) was purchased from NINDS Stem Cell Catalogue. Cell lines UCL-CTRL001 (WT/WT) (RRID:CVCL\_B7T4); UCL-CTRL002 (WT/WT) (RRID:CVCL\_B7T5); UCL-CTRL003 (WT/WT) (RRID:CVCL\_B7T6); UCL-YCTRL001 (WT/WT) (RRID:CVCL\_B7T8); UCL-E001K (WT/E326K)

(RRID:CVCL\_B7T9); UCL-N001S (N370S/N370S) (RRID:CVCL\_B7TA) and UCL-N002S (N370S/N370S) (RRID:CVCL\_B7TB) were generated in the Schapira laboratory and are being deposited to ATCC and will be available by final publication. Fibroblast cell line 7301 was obtained from the MRC Centre for Neuromuscular Diseases Biobank London, supported by the National Institute for Health Research Biomedical Research Centres at Great Ormond Street Hospital for Children NHS Foundation Trust and at University College London Hospitals NHS Foundation Trust and University College London. Details of the fibroblast cell lines used in this study can be found in Supplemental Table 1. Parental SH-SY5Y cells were purchased from ATCC (ATCC Cat# CRL-2266, RRID:CVCL\_0019).

### **Fibroblast cell culture**

Fibroblasts were cultured in Dulbecco's modified eagle media (DMEM) 4500 (mg/L) growth medium supplemented with Glutamax (Invitrogen), 10% foetal bovine serum (FBS), non-essential amino acids (NEAA: 0.1 mM of: glycine, L-alanine, L-asparagine, L-aspartic acid, L-glutamic acid, L-proline and L-serine) and penicillin/streptomycin antibiotic cocktail (50ng/ml) at 37°C and 5% CO<sub>2</sub> ([dx.doi.org/10.17504/protocols.io.rm7vzy542lx1/v1](https://doi.org/10.17504/protocols.io.rm7vzy542lx1/v1)). Analyses were carried out at low passages, and disease and control cultures were matched for passage number.

### **Generation of SH-SY5Y cell lines**

Proliferating SH-SY5Y neuroblastoma cell lines were cultured as previously described (33) ([dx.doi.org/10.17504/protocols.io.bp2l617jzvqe/v1](https://doi.org/10.17504/protocols.io.bp2l617jzvqe/v1)). SH-SY5Y cells were transfected with a pcDNA3.1 vector plasmid containing wild-type, E326K, L444P or N370S *GBA* cDNA. Mutations were introduced by site directed mutagenesis, according to the manufacturer's guidelines (Agilent Technologies QuikChange II Site-



Directed Mutagenesis Kit)  
(<https://www.agilent.com/cs/library/usermanuals/public/200523.pdf>). Stable  
transfection was performed using the XtremeGENE reagent for 72 hours, and 400  
µg/ml G418 antibiotics used as the selection marker  
([dx.doi.org/10.17504/protocols.io.rm7vzy54rlx1/v1](https://doi.org/10.17504/protocols.io.rm7vzy54rlx1/v1)). Colonies were selected and  
expanded for routine culture in growth media supplemented with G418. For analysis  
two clones per genotype were used.

### **SDS-PAGE and Western blotting**

Cells were lysed in 1% (v/v) Triton X-100 in phosphate buffered saline (PBS) lysis  
buffer with protease and phosphatase inhibitors. Cell lysates containing 10 – 30 µg of  
protein were electrophoresed with NuPage™ 4-12% Bis-Tris protein gels. Proteins  
were transferred to a PVDF membrane, blocked in 10% milk and treated with primary  
and secondary antibodies in 5% milk. For analysis of alpha-synuclein, an additional  
step was added prior to blocking to fix the membrane with 4% PFA (w/v) and 0.01%  
(v/v) glutaraldehyde for 30 minutes. Antibody binding was detected using the GE  
Healthcare Amersham™ electro-chemi-luminescence (ECL)™ Prime Western  
Blotting Detection Reagent ([dx.doi.org/10.17504/protocols.io.261genwyyg47/v1](https://doi.org/10.17504/protocols.io.261genwyyg47/v1)). The  
following antibodies were used: GBA clone 2e2 (AP1140 Millipore, dilution 1:1000);  
GRP78/BiP (ab21685 Abcam, dilution 1:1000); monomeric alpha-synuclein (MJFR1  
ab138501 Abcam, dilution 1:1000); LAMP1 (NB120-19294 Novus, dilution 1:1000); β-  
actin (ab8227 Abcam, 1:10000).

### **Triton X-100 extraction of soluble and insoluble alpha-synuclein**

SH-SY5Y cells were trypsinised and lysed in 1% (v/v) Triton X-100, 50 mM Tris, pH  
7.5, 750 mM NaCl, 5 mM EDTA, 4 units RQ1 RNase-free DNase (Promega), protease

and phosphatase inhibitor mix (Halt) on ice for 15 minutes. The lysate was passed through a 23G needle and pelleted at 17,000 x g for 30 minutes at 4°C. Triton X 100 soluble fraction was collected and protein concentration measured using the BCA protein assay. Insoluble pellets were resuspended in 2% (w/v) SDS, 8 M urea, 10 mM Tris, pH 7.5, 4 units RQ1 RNase-free DNase, protease and phosphatase inhibitor mix and incubated for 15 minutes at room temperature. Debris was removed by centrifugation at 17,000 x g for 30 minutes at 4°C ([dx.doi.org/10.17504/protocols.io.6qpvr6p1ovmk/v1](https://doi.org/10.17504/protocols.io.6qpvr6p1ovmk/v1)).

### **Quantitative real-time PCR of mRNA**

RNA was isolated from cells using the QIAGEN RNeasy mini kit ([dx.doi.org/10.17504/protocols.io.ssbeean](https://doi.org/10.17504/protocols.io.ssbeean)). Quantitative analysis of mRNA was performed as previous (99) ([dx.doi.org/10.17504/protocols.io.q26g74xoqgwz/v1](https://doi.org/10.17504/protocols.io.q26g74xoqgwz/v1)). GAPDH was amplified as the reference mRNA. Relative gene expression was calculated using the  $\Delta C_T$  method. All results obtained were from the evaluation of two technical duplicates of three independent experiments.

### **Total cellular lysosomal enzyme assays**

Cells were lysed in 1% (v/v) Triton X-100 in PBS with protease and phosphatase inhibitors. Activity was measured as described previously (10) GCase activity was measured in McIlvaine buffer at pH 5.4 in the presence of 22 mM sodium taurocholate (NaT) and at pH 4.5, with 5 mM methylumbelliferyl- $\beta$ -D-glucopyranoside (M-Glu) substrate ([dx.doi.org/10.17504/protocols.io.n2bvj625nlk5/v1](https://doi.org/10.17504/protocols.io.n2bvj625nlk5/v1)).  $\beta$ -Galactosidase and  $\beta$ -Hexosaminidase activity was measured in McIlvaine buffer at pH 4.1 with 1 mM 4-Methylumbelliferyl  $\beta$ -D-galactopyranoside and 2 mM 4-Methylumbelliferyl N-acetyl- $\beta$ -D-glucosaminide substrates, respectively ([dx.doi.org/10.17504/protocols.io.kqdg3p8r7l25/v1](https://doi.org/10.17504/protocols.io.kqdg3p8r7l25/v1)).

### **Real-time lysosomal GCCase assay**

Lysosomal GCCase activity, but not ER and Golgi-resident GCCase activity, can be measured in live cells by using 5-(pentafluorobenzoylamino) fluorescein Di- $\beta$ -D-glucopyranoside (PFB-FDGlu; ThermoFisher) as a substrate that is taken up into acidic vesicles only, where it fluoresces upon catalysis with GCCase (46) ([dx.doi.org/10.17504/protocols.io.eq2lyn8mqvx9/v1](https://doi.org/10.17504/protocols.io.eq2lyn8mqvx9/v1)). Fibroblasts were grown to 70-90% confluency and the real-time GCCase activity assay was performed as described previously (99). Condurotol-B-epoxide (CBE)-sensitive initial rate was calculated and normalised to protein concentration in the well. Cells were measured in triplicates.

### **Endo H analysis**

Fibroblasts were lysed in 1% (v/v) Triton X-100 in PBS and protein concentration determined by a BCA assay. Digestions were performed according to the manufacturer's instructions (New England BioLabs #P0702L and #P0704S) ([dx.doi.org/10.17504/protocols.io.8epv59ew4g1b/v1](https://doi.org/10.17504/protocols.io.8epv59ew4g1b/v1) and [dx.doi.org/10.17504/protocols.io.cqfvtm](https://doi.org/10.17504/protocols.io.cqfvtm)). For wild-type, E326K and N370S mutant lines, 20  $\mu$ g of total protein was denatured and for L444P mutants 60  $\mu$ g of total protein was denatured. Following this, denatured protein sample was incubated for 2 hours at 37°C, with 500,000 units/ml of either Endo H or PNGase F and analysed by western blotting.

### **Staining for lipid droplets**

Cells were grown on coverslips until 50-80% confluent. Analysis was performed on SH-SY5Y cells cultured in normal media, as well as fibroblasts and SH-SY5Y cells treated for 5 hours with 100  $\mu$ M oleic acid (OA) following over-night starvation in Opti-MEM (ThermoFisher). OA is a potent inducer of lipid droplet formation (55). Cells were treated with 250  $\mu$ L BODIPY™ 493/503 (4,4-Difluoro-1,3,5,7,8-Pentamethyl-4-Bora-

3a,4a-Diaza-s-Indacene) diluted in PBS at a final concentration of 1 mg/ml for 15 minutes in the dark at room temperature. Following incubation, coverslips were washed three times in PBS and mounted onto glass slides with 1 µg/mL DAPI CitiFluor for analysis on a Zeiss Axioplan microscope (QImaging wLS). Images were captured using Micro-Manager software and analysed using ImageJ software with a macro to calculate the number of lipid droplets and cell area ([dx.doi.org/10.17504/protocols.io.q26g74xqqgwz/v1](https://doi.org/10.17504/protocols.io.q26g74xqqgwz/v1)).

### **Statistics**

Graphs were made using GraphPad Prism version 9.3.1 and data expressed as MEAN ± standard error of the mean (SEM). Statistical significance was determined by one-way ANOVA and Tukey's post hoc or two-way ANOVA and Tukey's post hoc test using GraphPad Prism version 9.3.1. Data distribution was assumed as normal without formal testing.

### **Funding**

This research was supported by Parkinson's UK [Grant number: G-1704] and the Kattan Trust. This research was funded, in part, by Aligning Science Across Parkinson's [Grant number: ASAP-000420] through the Michael J. Fox Foundation for Parkinson's Research (MJFF). For the purpose of open access, the author has applied a CC BY 4.0 public copyright license to all Author Accepted Manuscripts arising from this submission. A.H.V.S. is supported by the National Institute for Health Research University College London Hospitals Biomedical Research Centre. M.M.B is funded by Erasmus+ program (Friedrich-Alexander University, Erlangen, Germany).

## Acknowledgements

The MRC Centre for Neuromuscular Diseases Biobank London, supported by the National Institute for Health Research Biomedical Research Centres at Great Ormond Street Hospital for Children NHS Foundation Trust and at University College London Hospitals NHS Foundation Trust and University College London, is acknowledged for providing the fibroblast cell line 7301.

## Conflict of Interest Statement

No conflicts of interest to declare.

## References

- 1 Sidransky, E., Nalls, M.A., Aasly, J.O., Aharon-Peretz, J., Annesi, G., Barbosa, E.R., Bar-Shira, A., Berg, D., Bras, J., Brice, A. *et al.* (2009) Multi-center analysis of glucocerebrosidase mutations in Parkinson disease. *The New England journal of medicine*, **361**, 1651-1661.
- 2 Mata, I.F., Samii, A., Schneer, S.H., Roberts, J.W., Griffith, A., Leis, B.C., Schellenberg, G.D., Sidransky, E., Bird, T.D., Leverenz, J.B. *et al.* (2008) Glucocerebrosidase gene mutations: a risk factor for Lewy body disorders. *Arch Neurol*, **65**, 379-382.
- 3 Bultron, G., Kacena, K., Pearson, D., Boxer, M., Yang, R., Sathe, S., Pastores, G. and Mistry, P.K. (2010) The risk of Parkinson's disease in type 1 Gaucher disease. *J Inherit Metab Dis*, **33**, 167-173.
- 4 McNeill, A., Duran, R., Hughes, D.A., Mehta, A. and Schapira, A.H. (2012) A clinical and family history study of Parkinson's disease in heterozygous glucocerebrosidase mutation carriers. *Journal of neurology, neurosurgery, and psychiatry*, **83**, 853-854.
- 5 McNeill, A., Duran, R., Proukakis, C., Bras, J., Hughes, D., Mehta, A., Hardy, J., Wood, N.W. and Schapira, A.H. (2012) Hyposmia and cognitive impairment in Gaucher disease patients and carriers. *Movement disorders : official journal of the Movement Disorder Society*, **27**, 526-532.
- 6 Neumann, J., Bras, J., Deas, E., O'Sullivan, S.S., Parkkinen, L., Lachmann, R.H., Li, A., Holton, J., Guerreiro, R., Paudel, R. *et al.* (2009) Glucocerebrosidase mutations in clinical and pathologically proven Parkinson's disease. *Brain*, **132**, 1783-1794.
- 7 Winder-Rhodes, S.E., Evans, J.R., Ban, M., Mason, S.L., Williams-Gray, C.H., Foltynie, T., Duran, R., Mencacci, N.E., Sawcer, S.J. and Barker, R.A. (2013) Glucocerebrosidase mutations influence the natural history of Parkinson's disease in a community-based incident cohort. *Brain*, **136**, 392-399.
- 8 Beavan, M., McNeill, A., Proukakis, C., Hughes, D.A., Mehta, A. and Schapira, A.H. (2015) Evolution of prodromal clinical markers of Parkinson disease in a GBA mutation-positive cohort. *JAMA neurology*, **72**, 201-208.
- 9 Parkkinen, L., Neumann, J., O'Sullivan, S.S., Holton, J.L., Revesz, T., Hardy, J. and Lees, A.J. (2011) Glucocerebrosidase mutations do not cause increased Lewy body pathology in Parkinson's disease. *Mol Genet Metab*, **103**, 410-412.

- 10 Gegg, M.E., Burke, D., Heales, S.J., Cooper, J.M., Hardy, J., Wood, N.W. and Schapira, A.H. (2012) Glucocerebrosidase deficiency in substantia nigra of parkinson disease brains. *Annals of neurology*, **72**, 455-463.
- 11 Sawkar, A.R., Adamski-Werner, S.L., Cheng, W.-C., Wong, C.-H., Beutler, E., Zimmer, K.-P. and Kelly, J.W. (2005) Gaucher Disease-Associated Glucocerebrosidases Show Mutation-Dependent Chemical Chaperoning Profiles. *Chem Biol*, **12**, 1235-1244.
- 12 Lerche, S., Schulte, C., Wurster, I., Machetanz, G., Roeben, B., Zimmermann, M., Deuschle, C., Hauser, A.-K., Böhringer, J., Krägeloh-Mann, I. *et al.* (2021) The Mutation Matters: CSF Profiles of GCase, Sphingolipids,  $\alpha$ -Synuclein in PDGBA. *Movement Disorders*, **36**, 1216-1228.
- 13 Cilia, R., Tunesi, S., Marotta, G., Cereda, E., Siri, C., Tesei, S., Zecchinelli, A.L., Canesi, M., Mariani, C.B., Meucci, N. *et al.* (2016) Survival and dementia in GBA-associated Parkinson's disease: The mutation matters. *Annals of Neurology*, **80**, 662-673.
- 14 Duran, R., Mencacci, N.E., Angeli, A.V., Shoai, M., Deas, E., Houlden, H., Mehta, A., Hughes, D., Cox, T.M., Deegan, P. *et al.* (2013) The glucocerebrosidase E326K variant predisposes to Parkinson's disease, but does not cause Gaucher's disease. *Mov Disord*, **28**, 232-236.
- 15 Chabas, A., Gort, L., Diaz-Font, A., Montfort, M., Santamaria, R., Cidras, M., Grinberg, D. and Vilageliu, L. (2005) Perinatal lethal phenotype with generalized ichthyosis in a type 2 Gaucher disease patient with the [L444P;E326K]/P182L genotype: effect of the E326K change in neonatal and classic forms of the disease. *Blood cells, molecules & diseases*, **35**, 253-258.
- 16 Liou, B. and Grabowski, G.A. (2012) Is E326K glucocerebrosidase a polymorphic or pathological variant? *Molecular Genetics and Metabolism*, **105**, 528-529.
- 17 Berge-Seidl, V., Pihlstrøm, L., Maple-Grødem, J., Forsgren, L., Linder, J., Larsen, J.P., Tysnes, O.-B. and Toft, M. (2017) The GBA variant E326K is associated with Parkinson's disease and explains a genome-wide association signal. *Neuroscience Letters*, **658**, 48-52.
- 18 den Heijer, J.M., Cullen, V.C., Quadri, M., Schmitz, A., Hilt, D.C., Lansbury, P., Berendse, H.W., van de Berg, W.D.J., de Bie, R.M.A., Boertien, J.M. *et al.* (2020) A Large-Scale Full GBA1 Gene Screening in Parkinson's Disease in the Netherlands. *Mov Disord*, **35**, 1667-1674.
- 19 Ruskey, J.A., Greenbaum, L., Roncière, L., Alam, A., Spiegelman, D., Liang, C., Levy, O.A., Waters, C., Fahn, S., Marder, K.S. *et al.* (2019) Increased yield of full GBA sequencing in Ashkenazi Jews with Parkinson's disease. *European journal of medical genetics*, **62**, 65-69.
- 20 Davis, M.Y., Johnson, C.O., Leverenz, J.B., Weintraub, D., Trojanowski, J.Q., Chen-Plotkin, A., Van Deerlin, V.M., Quinn, J.F., Chung, K.A., Peterson-Hiller, A.L. *et al.* (2016) Association of GBA Mutations and the E326K Polymorphism With Motor and Cognitive Progression in Parkinson Disease. *JAMA neurology*, **73**, 1217-1224.
- 21 Stoker, T.B., Camacho, M., Winder-Rhodes, S., Liu, G., Scherzer, C.R., Foltynie, T., Evans, J., Breen, D.P., Barker, R.A. and Williams-Gray, C.H. (2020) Impact of GBA1 variants on long-term clinical progression and mortality in incident Parkinson's disease. *Journal of neurology, neurosurgery, and psychiatry*, in press.
- 22 Greuel, A., Trezzi, J.-P., Glaab, E., Ruppert, M.C., Maier, F., Jäger, C., Hodak, Z., Lohmann, K., Ma, Y., Eidelberg, D. *et al.* (2020) GBA Variants in Parkinson's Disease: Clinical, Metabolomic, and Multimodal Neuroimaging Phenotypes. *Movement Disorders*, **35**, 2201-2210.
- 23 Schöndorf, D.C., Aureli, M., McAllister, F.E., Hindley, C.J., Mayer, F., Schmid, B., Sardi, S.P., Valsecchi, M., Hoffmann, S., Schwarz, L.K. *et al.* (2014) iPSC-derived neurons from GBA1-associated Parkinson's disease patients show autophagic defects and impaired calcium homeostasis. *Nature Communications*, **5**, 4028.
- 24 Fernandes, H.J.R., Hartfield, E.M., Christian, H.C., Emmanouilidou, E., Zheng, Y., Booth, H., Bogetofte, H., Lang, C., Ryan, B.J., Sardi, S.P. *et al.* (2016) ER Stress and Autophagic Perturbations Lead to Elevated Extracellular  $\alpha$ -Synuclein in GBA-N370S Parkinson's iPSC-Derived Dopamine Neurons. *Stem Cell Reports*, **6**, 342-356.

- 25 Maor, G., Rapaport, D. and Horowitz, M. (2019) The effect of mutant GBA1 on accumulation and aggregation of  $\alpha$ -synuclein. *Hum Mol Genet*, **28**, 1768-1781.
- 26 Migdalska-Richards, A., Wegrzynowicz, M., Rusconi, R., Deangeli, G., Di Monte, D.A., Spillantini, M.G. and Schapira, A.H.V. (2017) The L444P Gba1 mutation enhances alpha-synuclein induced loss of nigral dopaminergic neurons in mice. *Brain : a journal of neurology*, **140**, 2706-2721.
- 27 Sardi, S.P., Clarke, J., Kinnecom, C., Tamsett, T.J., Li, L., Stanek, L.M., Passini, M.A., Grabowski, G.A., Schlossmacher, M.G., Sidman, R.L. *et al.* (2011) CNS expression of glucocerebrosidase corrects alpha-synuclein pathology and memory in a mouse model of Gaucher-related synucleinopathy. *Proceedings of the National Academy of Sciences of the United States of America*, **108**, 12101-12106.
- 28 Yang, S.-Y., Beavan, M., Chau, K.-Y., Taanman, J.-W. and Schapira, A.H.V. (2017) A Human Neural Crest Stem Cell-Derived Dopaminergic Neuronal Model Recapitulates Biochemical Abnormalities in GBA1 Mutation Carriers. *Stem Cell Reports*, **8**, 728-742.
- 29 Maor, G., Rencus-Lazar, S., Filocamo, M., Steller, H., Segal, D. and Horowitz, M. (2013) Unfolded protein response in Gaucher disease: from human to *Drosophila*. *Orphanet Journal of Rare Diseases*, **8**, 140.
- 30 Ron, I. and Horowitz, M. (2005) ER retention and degradation as the molecular basis underlying Gaucher disease heterogeneity. *Hum Mol Genet*, **14**, 2387-2398.
- 31 Bendikov-Bar, I., Ron, I., Filocamo, M. and Horowitz, M. (2011) Characterization of the ERAD process of the L444P mutant glucocerebrosidase variant. *Blood Cells, Molecules, and Diseases*, **46**, 4-10.
- 32 Kinghorn, K.J., Gronke, S., Castillo-Quan, J.I., Woodling, N.S., Li, L., Sirka, E., Gegg, M., Mills, K., Hardy, J., Bjedov, I. *et al.* (2016) A *Drosophila* Model of Neuronopathic Gaucher Disease Demonstrates Lysosomal-Autophagic Defects and Altered mTOR Signalling and Is Functionally Rescued by Rapamycin. *J Neurosci*, **36**, 11654-11670.
- 33 Magalhaes, J., Gegg, M.E., Migdalska-Richards, A., Doherty, M.K., Whitfield, P.D. and Schapira, A.H.V. (2016) Autophagic lysosome reformation dysfunction in glucocerebrosidase deficient cells: relevance to Parkinson disease. *Human molecular genetics*, **25**, 3432-3445.
- 34 Mazzulli, J.R., Xu, Y.H., Sun, Y., Knight, A.L., McLean, P.J., Caldwell, G.A., Sidransky, E., Grabowski, G.A. and Krainc, D. (2011) Gaucher disease glucocerebrosidase and alpha-synuclein form a bidirectional pathogenic loop in synucleinopathies. *Cell*, **146**, 37-52.
- 35 Sardi, S.P., Viel, C., Clarke, J., Treleaven, C.M., Richards, A.M., Park, H., Olszewski, M.A., Dodge, J.C., Marshall, J., Makino, E. *et al.* (2017) Glucosylceramide synthase inhibition alleviates aberrations in synucleinopathy models. *Proceedings of the National Academy of Sciences of the United States of America*, **114**, 2699-2704.
- 36 Nagata, M., Izumi, Y., Ishikawa, E., Kiyotake, R., Doi, R., Iwai, S., Omahdi, Z., Yamaji, T., Miyamoto, T., Bamba, T. *et al.* (2017) Intracellular metabolite  $\beta$ -glucosylceramide is an endogenous Mincle ligand possessing immunostimulatory activity. *Proceedings of the National Academy of Sciences*, **114**, E3285-E3294.
- 37 Orvisky, E., Park, J.K., LaMarca, M.E., Ginns, E.I., Martin, B.M., Tayebi, N. and Sidransky, E. (2002) Glucosylsphingosine accumulation in tissues from patients with Gaucher disease: correlation with phenotype and genotype. *Mol Genet Metab*, **76**, 262-270.
- 38 Farfel-Becker, T., Vitner, E.B., Kelly, S.L., Bame, J.R., Duan, J., Shinder, V., Merrill, A.H., Jr., Dobrenis, K. and Futerman, A.H. (2014) Neuronal accumulation of glucosylceramide in a mouse model of neuronopathic Gaucher disease leads to neurodegeneration. *Hum Mol Genet*, **23**, 843-854.
- 39 Rocha, E.M., Smith, G.A., Park, E., Cao, H., Graham, A.-R., Brown, E., McLean, J.R., Hayes, M.A., Beagan, J., Izen, S.C. *et al.* (2015) Sustained Systemic Glucocerebrosidase Inhibition Induces Brain  $\alpha$ -Synuclein Aggregation, Microglia and Complement C1q Activation in Mice. *Antioxidants & Redox Signaling*, **23**, 550-564.
- 40 Xu, Y.H., Sun, Y., Ran, H., Quinn, B., Witte, D. and Grabowski, G.A. (2011) Accumulation and distribution of alpha-synuclein and ubiquitin in the CNS of Gaucher disease mouse models. *Mol Genet Metab*, **102**, 436-447.

- 41 Hallett, P.J., Huebeker, M., Brekk, O.R., Moloney, E.B., Rocha, E.M., Priestman, D.A., Platt, F.M. and Isacson, O. (2018) Glycosphingolipid levels and glucocerebrosidase activity are altered in normal aging of the mouse brain. *Neurobiol Aging*, **67**, 189-200.
- 42 Galvagnion, C., Marlet, F.R., Cerri, S., Schapira, A.H.V., Blandini, F. and Di Monte, D.A. (2022) Sphingolipid changes in Parkinson L444P GBA mutation fibroblasts promote  $\alpha$ -synuclein aggregation. *Brain*, in press.
- 43 Zunke, F., Moise, A.C., Belur, N.R., Gelyana, E., Stojkovska, I., Dzaferbegovic, H., Toker, N.J., Jeon, S., Fredriksen, K. and Mazzulli, J.R. (2018) Reversible Conformational Conversion of  $\alpha$ -Synuclein into Toxic Assemblies by Glucosylceramide. *Neuron*, **97**, 92-107.e110.
- 44 Taguchi, Y.V., Liu, J., Ruan, J., Pacheco, J., Zhang, X., Abbasi, J., Keutzer, J., Mistry, P.K. and Chandra, S.S. (2017) Glucosylsphingosine Promotes alpha-Synuclein Pathology in Mutant GBA-Associated Parkinson's Disease. *J Neurosci*, **37**, 9617-9631.
- 45 Guedes, L.C., Chan, R.B., Gomes, M.A., Conceição, V.A., Machado, R.B., Soares, T., Xu, Y., Gaspar, P., Carriço, J.A., Alcalay, R.N. *et al.* (2017) Serum lipid alterations in GBA-associated Parkinson's disease. *Parkinsonism & Related Disorders*, **44**, 58-65.
- 46 Mazzulli, J.R., Zunke, F., Isacson, O., Studer, L. and Krainc, D. (2016) alpha-Synuclein-induced lysosomal dysfunction occurs through disruptions in protein trafficking in human midbrain synucleinopathy models. *Proc Natl Acad Sci U S A*, **113**, 1931-1936.
- 47 Lee, A.S. (2005) The ER chaperone and signaling regulator GRP78/BiP as a monitor of endoplasmic reticulum stress. *Methods*, **35**, 373-381.
- 48 Hu, H., Tian, M., Ding, C. and Yu, S. (2018) The C/EBP Homologous Protein (CHOP) Transcription Factor Functions in Endoplasmic Reticulum Stress-Induced Apoptosis and Microbial Infection. *Front Immunol*, **9**, 3083.
- 49 Yang, S.-y., Gegg, M., Chau, D. and Schapira, A. (2020) Glucocerebrosidase activity, cathepsin D and monomeric  $\alpha$ -synuclein interactions in a stem cell derived neuronal model of a PD associated GBA1 mutation. *Neurobiology of Disease*, **134**, 104620.
- 50 Iwatsubo, T. (2003) Aggregation of  $\alpha$ -synuclein in the pathogenesis of Parkinson's disease. *Journal of Neurology*, **250**, iii11-iii14.
- 51 Fais, M., Dore, A., Galioto, M., Galleri, G., Crosio, C. and Iaccarino, C. (2021) Parkinson's Disease-Related Genes and Lipid Alteration. *International journal of molecular sciences*, **22**, 7630.
- 52 Smith, L. and Schapira, A.H.V. (2022) GBA Variants and Parkinson Disease: Mechanisms and Treatments. *Cells*, **11**, 1261.
- 53 Gegg, M.E. and Schapira, A.H.V. (2018) The role of glucocerebrosidase in Parkinson disease pathogenesis. *The FEBS journal*, **285**, 3591-3603.
- 54 Farmer, B.C., Walsh, A.E., Klumper, J.C. and Johnson, L.A. (2020) Lipid Droplets in Neurodegenerative Disorders. *Front Neurosci*, **14**, 742.
- 55 Nakajima, S., Gotoh, M., Fukasawa, K., Murakami-Murofushi, K. and Kunugi, H. (2019) Oleic acid is a potent inducer for lipid droplet accumulation through its esterification to glycerol by diacylglycerol acyltransferase in primary cortical astrocytes. *Brain Res*, **1725**, 146484.
- 56 Malini, E., Grossi, S., Deganuto, M., Rosano, C., Parini, R., Dominisini, S., Cariati, R., Zampieri, S., Bembi, B., Filocamo, M. *et al.* (2014) Functional analysis of 11 novel GBA alleles. *Eur J Hum Genet*, **22**, 511-516.
- 57 Grace, M.E., Ashton-Prolla, P., Pastores, G.M., Soni, A. and Desnick, R.J. (1999) Non-pseudogene-derived complex acid beta-glucosidase mutations causing mild type 1 and severe type 2 gaucher disease. *The Journal of clinical investigation*, **103**, 817-823.
- 58 Horowitz, M., Pasmanik-Chor, M., Ron, I. and Kolodny, E.H. (2011) The enigma of the E326K mutation in acid beta-glucocerebrosidase. *Mol Genet Metab*, **104**, 35-38.
- 59 Alcalay, R.N., Levy, O.A., Waters, C.C., Fahn, S., Ford, B., Kuo, S.H., Mazzoni, P., Pauculo, M.W., Nichols, W.C., Gan-Or, Z. *et al.* (2015) Glucocerebrosidase activity in Parkinson's disease with and without GBA mutations. *Brain : a journal of neurology*, **138**, 2648-2658.
- 60 Alcalay, R.N., Wolf, P., Chiang, M.S.R., Helesicova, K., Zhang, X.K., Merchant, K., Hutten, S.J., Scherzer, C., Caspell-Garcia, C., Blauwendraat, C. *et al.* (2020) Longitudinal



Measurements of Glucocerebrosidase activity in Parkinson's patients. *Annals of clinical and translational neurology*, **7**, 1816-1830.

61 McNeill, A., Magalhaes, J., Shen, C., Chau, K.Y., Hughes, D., Mehta, A., Foltynie, T., Cooper, J.M., Abramov, A.Y., Gegg, M. *et al.* (2014) Ambroxol improves lysosomal biochemistry in glucocerebrosidase mutation-linked Parkinson disease cells. *Brain*, **137**, 1481-1495.

62 Sanchez-Martinez, A., Beavan, M., Gegg, M.E., Chau, K.Y., Whitworth, A.J. and Schapira, A.H. (2016) Parkinson disease-linked GBA mutation effects reversed by molecular chaperones in human cell and fly models. *Sci Rep*, **6**, 31380.

63 de la Mata, M., Cotán, D., Oropesa-Ávila, M., Garrido-Maraver, J., Cordero, M.D., Villanueva Paz, M., Delgado Pavón, A., Alcocer-Gómez, E., de Lavera, I., Ybot-González, P. *et al.* (2015) Pharmacological Chaperones and Coenzyme Q10 Treatment Improves Mutant  $\beta$ -Glucocerebrosidase Activity and Mitochondrial Function in Neuronopathic Forms of Gaucher Disease. *Scientific reports*, **5**, 10903-10903.

64 Patnaik, S., Zheng, W., Choi, J.H., Motabar, O., Southall, N., Westbroek, W., Lea, W.A., Velayati, A., Goldin, E., Sidransky, E. *et al.* (2012) Discovery, structure-activity relationship, and biological evaluation of noninhibitory small molecule chaperones of glucocerebrosidase. *J Med Chem*, **55**, 5734-5748.

65 Mu, T.W., Fowler, D.M. and Kelly, J.W. (2008) Partial restoration of mutant enzyme homeostasis in three distinct lysosomal storage disease cell lines by altering calcium homeostasis. *PLoS Biol*, **6**, e26.

66 Cerri, S., Ghezzi, C., Ongari, G., Croce, S., Avenali, M., Zangaglia, R., Di Monte, D.A., Valente, E.M. and Blandini, F. (2021) GBA Mutations Influence the Release and Pathological Effects of Small Extracellular Vesicles from Fibroblasts of Patients with Parkinson's Disease. *Int J Mol Sci*, **22**.

67 Garcia-Sanz, P., Orgaz, L., Bueno-Gil, G., Espadas, I., Rodriguez-Traver, E., Kulisevsky, J., Gutierrez, A., Davila, J.C., Gonzalez-Polo, R.A., Fuentes, J.M. *et al.* (2017) N370S-GBA1 mutation causes lysosomal cholesterol accumulation in Parkinson's disease. *Mov Disord*, **32**, 1409-1422.

68 Wang, F., Song, W., Brancati, G. and Segatori, L. (2011) Inhibition of endoplasmic reticulum-associated degradation rescues native folding in loss of function protein misfolding diseases. *The Journal of biological chemistry*, **286**, 43454-43464.

69 Thomas, R., Moloney, E.B., Macbain, Z.K., Hallett, P.J. and Isacson, O. (2021) Fibroblasts from idiopathic Parkinson's disease exhibit deficiency of lysosomal glucocerebrosidase activity associated with reduced levels of the trafficking receptor LIMP2. *Mol Brain*, **14**, 16.

70 Schmitz, M., Alfalah, M., Aerts, J.M., Naim, H.Y. and Zimmer, K.P. (2005) Impaired trafficking of mutants of lysosomal glucocerebrosidase in Gaucher's disease. *Int J Biochem Cell Biol*, **37**, 2310-2320.

71 Tan, Y.L., Genereux, J.C., Pankow, S., Aerts, J.M., Yates, J.R., 3rd and Kelly, J.W. (2014) ERdj3 is an endoplasmic reticulum degradation factor for mutant glucocerebrosidase variants linked to Gaucher's disease. *Chem Biol*, **21**, 967-976.

72 Marques, A.R., Mirzaian, M., Akiyama, H., Wisse, P., Ferraz, M.J., Gaspar, P., Ghauharali-van der Vlugt, K., Meijer, R., Giraldo, P., Alfonso, P. *et al.* (2016) Glucosylated cholesterol in mammalian cells and tissues: formation and degradation by multiple cellular  $\beta$ -glucosidases. *J Lipid Res*, **57**, 451-463.

73 Galvagnion, C., Brown, J.W.P., Ouberai, M.M., Flagmeier, P., Vendruscolo, M., Buell, A.K., Sparr, E. and Dobson, C.M. (2016) Chemical properties of lipids strongly affect the kinetics of the membrane-induced aggregation of  $\alpha$ -synuclein. *Proceedings of the National Academy of Sciences of the United States of America*, **113**, 7065-7070.

74 Kaushik, S., Massey, A.C. and Cuervo, A.M. (2006) Lysosome membrane lipid microdomains: novel regulators of chaperone-mediated autophagy. *EMBO J*, **25**, 3921-3933.

75 Ron, I., Dagan, A., Gatt, S., Pasmanik-Chor, M. and Horowitz, M. (2005) Use of fluorescent substrates for characterization of Gaucher disease mutations. *Blood Cells, Molecules, and Diseases*, **35**, 57-65.

- 76 Stojkowska, I., Krainc, D. and Mazzulli, J.R. (2018) Molecular mechanisms of  $\alpha$ -synuclein and GBA1 in Parkinson's disease. *Cell Tissue Res*, **373**, 51-60.
- 77 Migdalska-Richards, A., Wegrzynowicz, M., Harrison, I.F., Verona, G., Bellotti, V., Spillantini, M.G. and Schapira, A.H.V. (2020) L444P Gba1 mutation increases formation and spread of alpha-synuclein deposits in mice injected with mouse alpha-synuclein pre-formed fibrils. *PLoS One*, **15**, e0238075.
- 78 Yun, S.P., Kim, D., Kim, S., Kim, S., Karuppagounder, S.S., Kwon, S.-H., Lee, S., Kam, T.-I., Lee, S., Ham, S. *et al.* (2018)  $\alpha$ -Synuclein accumulation and GBA deficiency due to L444P GBA mutation contributes to MPTP-induced parkinsonism. *Molecular neurodegeneration*, **13**, 1-1.
- 79 Smith, L., Mullin, S. and Schapira, A.H.V. (2017) Insights into the structural biology of Gaucher disease. *Exp Neurol*, **298**, 180-190.
- 80 Yap, T.L., Gruschus, J.M., Velayati, A., Westbroek, W., Goldin, E., Moaven, N., Sidransky, E. and Lee, J.C. (2011) Alpha-synuclein interacts with Glucocerebrosidase providing a molecular link between Parkinson and Gaucher diseases. *J Biol Chem*, **286**, 28080-28088.
- 81 Alecu, I. and Bennett, S.A.L. (2019) Dysregulated Lipid Metabolism and Its Role in  $\alpha$ -Synucleinopathy in Parkinson's Disease. *Frontiers in neuroscience*, **13**, 328-328.
- 82 Yang, L., Liang, J., Lam, S.M., Yavuz, A., Shui, G., Ding, M. and Huang, X. (2020) Neuronal lipolysis participates in PUFA-mediated neural function and neurodegeneration. *EMBO reports*, **21**, e50214.
- 83 Fanning, S., Haque, A., Imberdis, T., Baru, V., Barrasa, M.I., Nuber, S., Termine, D., Ramalingam, N., Ho, G.P.H., Noble, T. *et al.* (2019) Lipidomic Analysis of  $\alpha$ -Synuclein Neurotoxicity Identifies Stearoyl CoA Desaturase as a Target for Parkinson Treatment. *Mol Cell*, **73**, 1001-1014.e1008.
- 84 Han, X., Zhu, J., Zhang, X., Song, Q., Ding, J., Lu, M., Sun, S. and Hu, G. (2018) Plin4-Dependent Lipid Droplets Hamper Neuronal Mitophagy in the MPTP/p-Induced Mouse Model of Parkinson's Disease. *Frontiers in Neuroscience*, **12**.
- 85 Unger, R.H. and Orci, L. (2002) Lipoapoptosis: its mechanism and its diseases. *Biochim Biophys Acta*, **1585**, 202-212.
- 86 Fu, S., Yang, L., Li, P., Hofmann, O., Dicker, L., Hide, W., Lin, X., Watkins, S.M., Ivanov, A.R. and Hotamisligil, G.S. (2011) Aberrant lipid metabolism disrupts calcium homeostasis causing liver endoplasmic reticulum stress in obesity. *Nature*, **473**, 528-531.
- 87 Velázquez, A.P., Tatsuta, T., Ghillebert, R., Drescher, I. and Graef, M. (2016) Lipid droplet-mediated ER homeostasis regulates autophagy and cell survival during starvation. *J Cell Biol*, **212**, 621-631.
- 88 Nguyen, T.B., Louie, S.M., Daniele, J.R., Tran, Q., Dillin, A., Zoncu, R., Nomura, D.K. and Olzmann, J.A. (2017) DGAT1-Dependent Lipid Droplet Biogenesis Protects Mitochondrial Function during Starvation-Induced Autophagy. *Dev Cell*, **42**, 9-21.e25.
- 89 Cole, N.B., Murphy, D.D., Grider, T., Rueter, S., Brasaemle, D. and Nussbaum, R.L. (2002) Lipid droplet binding and oligomerization properties of the Parkinson's disease protein alpha-synuclein. *The Journal of biological chemistry*, **277**, 6344-6352.
- 90 Outeiro, T.F. and Lindquist, S. (2003) Yeast cells provide insight into alpha-synuclein biology and pathobiology. *Science*, **302**, 1772-1775.
- 91 Glajch, K.E., Moors, T.E., Chen, Y., Bechade, P.A., Nam, A.Y., Rajsombath, M.M., McCaffery, T.D., Dettmer, U., Weihofen, A., Hirst, W.D. *et al.* (2021) Wild-type GBA1 increases the  $\alpha$ -synuclein tetramer–monomer ratio, reduces lipid-rich aggregates, and attenuates motor and cognitive deficits in mice. *Proceedings of the National Academy of Sciences*, **118**, e2103425118.
- 92 Gegg, M.E., Sweet, L., Wang, B.H., Shihabuddin, L.S., Sardi, S.P. and Schapira, A.H. (2015) No evidence for substrate accumulation in Parkinson brains with GBA mutations. *Mov Disord*, **30**, 1085-1089.
- 93 Huebner, M., Moloney, E.B., van der Spoel, A.C., Priestman, D.A., Isacson, O., Hallett, P.J. and Platt, F.M. (2019) Reduced sphingolipid hydrolase activities, substrate

accumulation and ganglioside decline in Parkinson's disease. *Molecular Neurodegeneration*, **14**, 40.

94 Wajner, M. and Amaral, A.U. (2015) Mitochondrial dysfunction in fatty acid oxidation disorders: insights from human and animal studies. *Biosci Rep*, **36**, e00281-e00281.

95 Lee, J., Homma, T., Kurahashi, T., Kang, E.S. and Fujii, J. (2015) Oxidative stress triggers lipid droplet accumulation in primary cultured hepatocytes by activating fatty acid synthesis. *Biochem Biophys Res Commun*, **464**, 229-235.

96 Kim, S., Wong, Y.C., Gao, F. and Krainc, D. (2021) Dysregulation of mitochondria-lysosome contacts by GBA1 dysfunction in dopaminergic neuronal models of Parkinson's disease. *Nature communications*, **12**, 1807-1807.

97 Schöndorf, D.C., Ivanyuk, D., Baden, P., Sanchez-Martinez, A., De Cicco, S., Yu, C., Giunta, I., Schwarz, L.K., Di Napoli, G., Panagiotakopoulou, V. *et al.* (2018) The NAD<sup>+</sup> Precursor Nicotinamide Riboside Rescues Mitochondrial Defects and Neuronal Loss in iPSC and Fly Models of Parkinson's Disease. *Cell Reports*, **23**, 2976-2988.

98 Schapira, A.H. and Gegg, M. (2011) Mitochondrial contribution to Parkinson's disease pathogenesis. *Parkinson's disease*, **2011**, 159160.

99 Gegg, M.E., Verona, G. and Schapira, A.H.V. (2020) Glucocerebrosidase deficiency promotes release of alpha-synuclein fibrils from cultured neurons. *Hum Mol Genet*, **29**, 1716-1728.

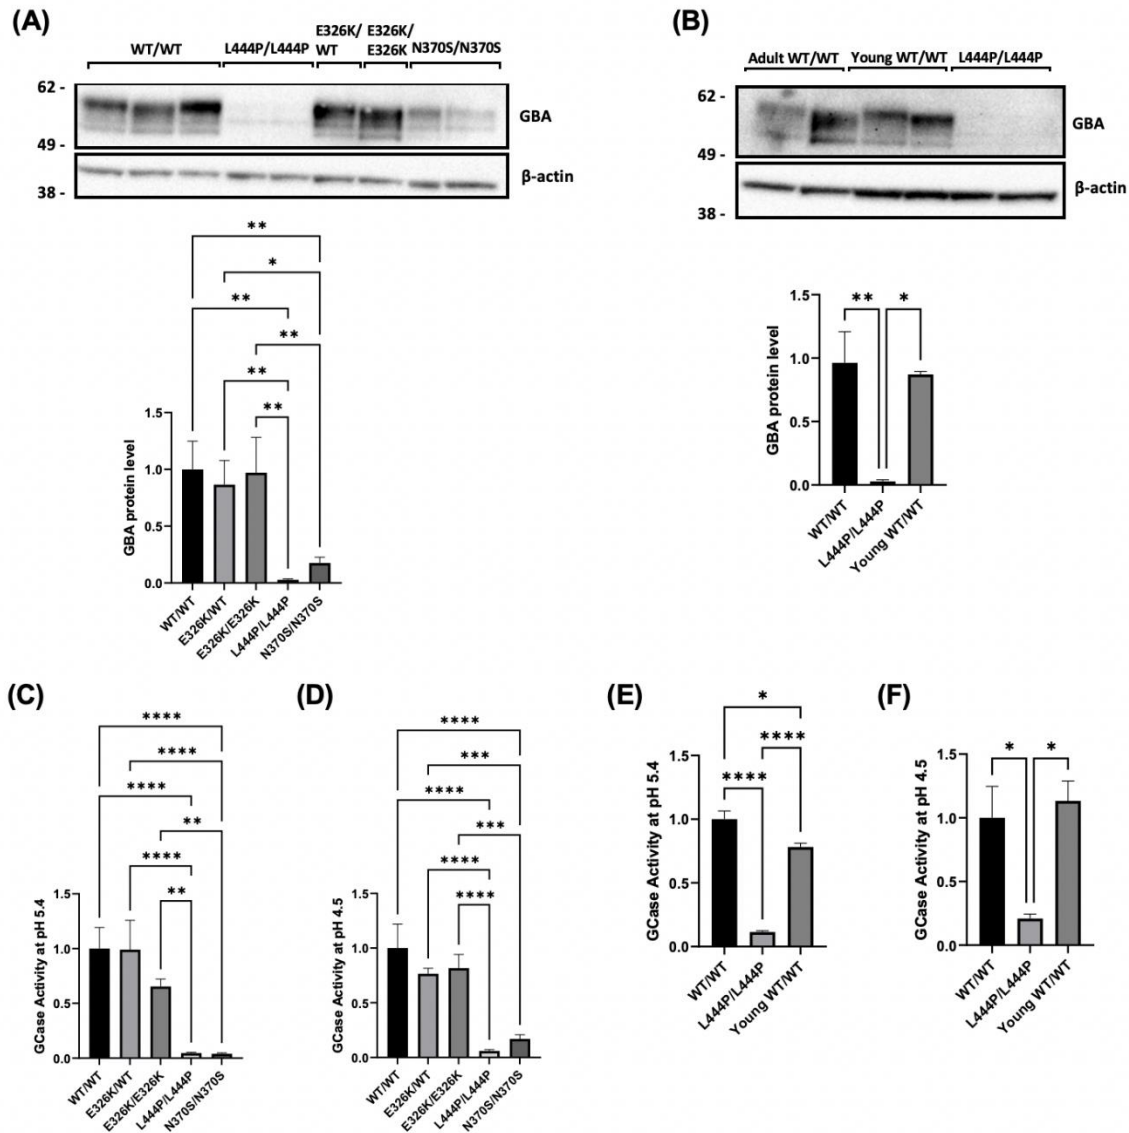

**Figure 1. GCCase protein level and activity in patient-derived fibroblasts. (A)** Immunoblot and quantification for GCCase protein level in fibroblasts normalised to WT/WT control fibroblasts as shown graphically as mean with SEM (\*\*p<0.01, \*\*\*p<0.001, \*\*\*\*p<0.0001; n=3). **(B)** Immunoblot and quantification for GCCase protein level in adult and young control fibroblasts normalised to WT/WT control fibroblasts (\*\*\*\*p<0.0001; n=3). GCCase activity assay with M-Glu was performed at **(C)** pH 5.4 with NaT and **(D)** pH 4.5 on fibroblast cell lysates. All data normalised to WT/WT control fibroblasts. GCCase activity in in adult and young control fibroblasts at **(E)** pH 5.4 with NaT and **(F)** pH 4.5. (\*\*p<0.01, \*\*\*p<0.001, \*\*\*\*p<0.0001; n=4). All data normalised to WT/WT control fibroblasts All graphs show mean with error bars as SEM. Statistical test used was one-way ANOVA with Tukey's post hoc analysis. Raw data can be found at: [10.5281/zenodo.6553597](https://zenodo.org/record/6553597).

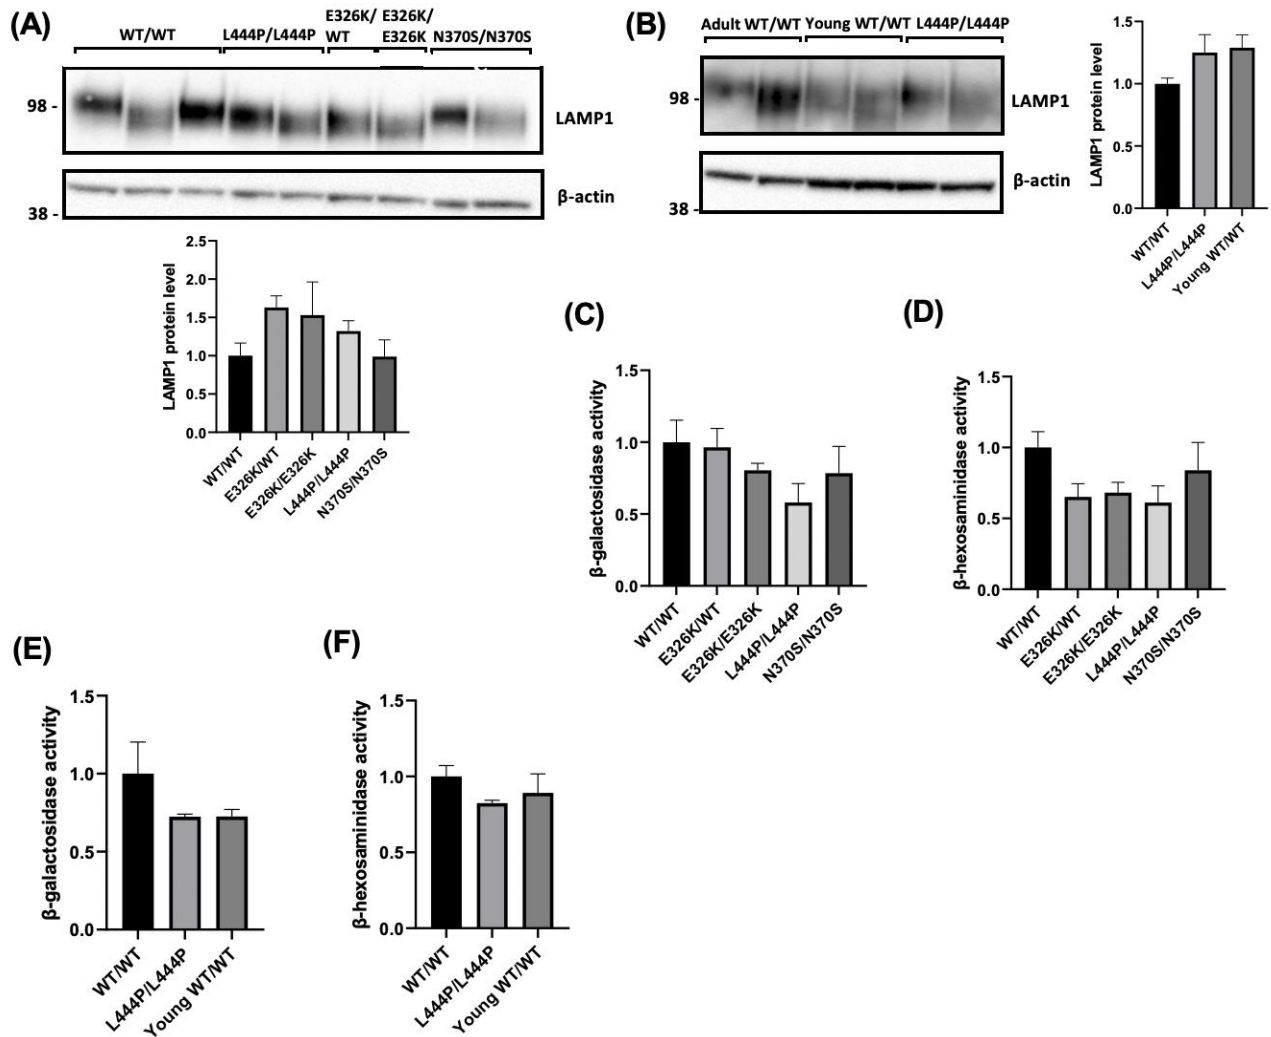

**Figure 2. Lysosomal content and function in patient-derived fibroblasts. (A)** LAMP1 levels were measured via western blot and quantified to assess the overall endo-lysosomal content of the fibroblasts. Data quantified and normalised to WT/WT fibroblast controls. **(B)** LAMP1 levels measured via western blot and compared to young control fibroblasts. Lysosomal function in patient-derived fibroblasts. The activities of lysosomal hydrolases, **(C)**  $\beta$ -galactosidase and **(D)**  $\beta$ -Hexosaminidase were measured at pH 4.1 to assess overall lysosomal function in fibroblasts. All data normalised to WT/WT control fibroblasts. The activities of lysosomal hydrolases, **(E)**  $\beta$ -galactosidase and **(F)**  $\beta$ -Hexosaminidase were measured with young control fibroblasts. All graphs show mean with error bars as SEM. Statistical test used was one-way ANOVA with Tukey's post hoc analysis. Raw data can be found at: [10.5281/zenodo.6553597](https://zenodo.org/record/6553597).

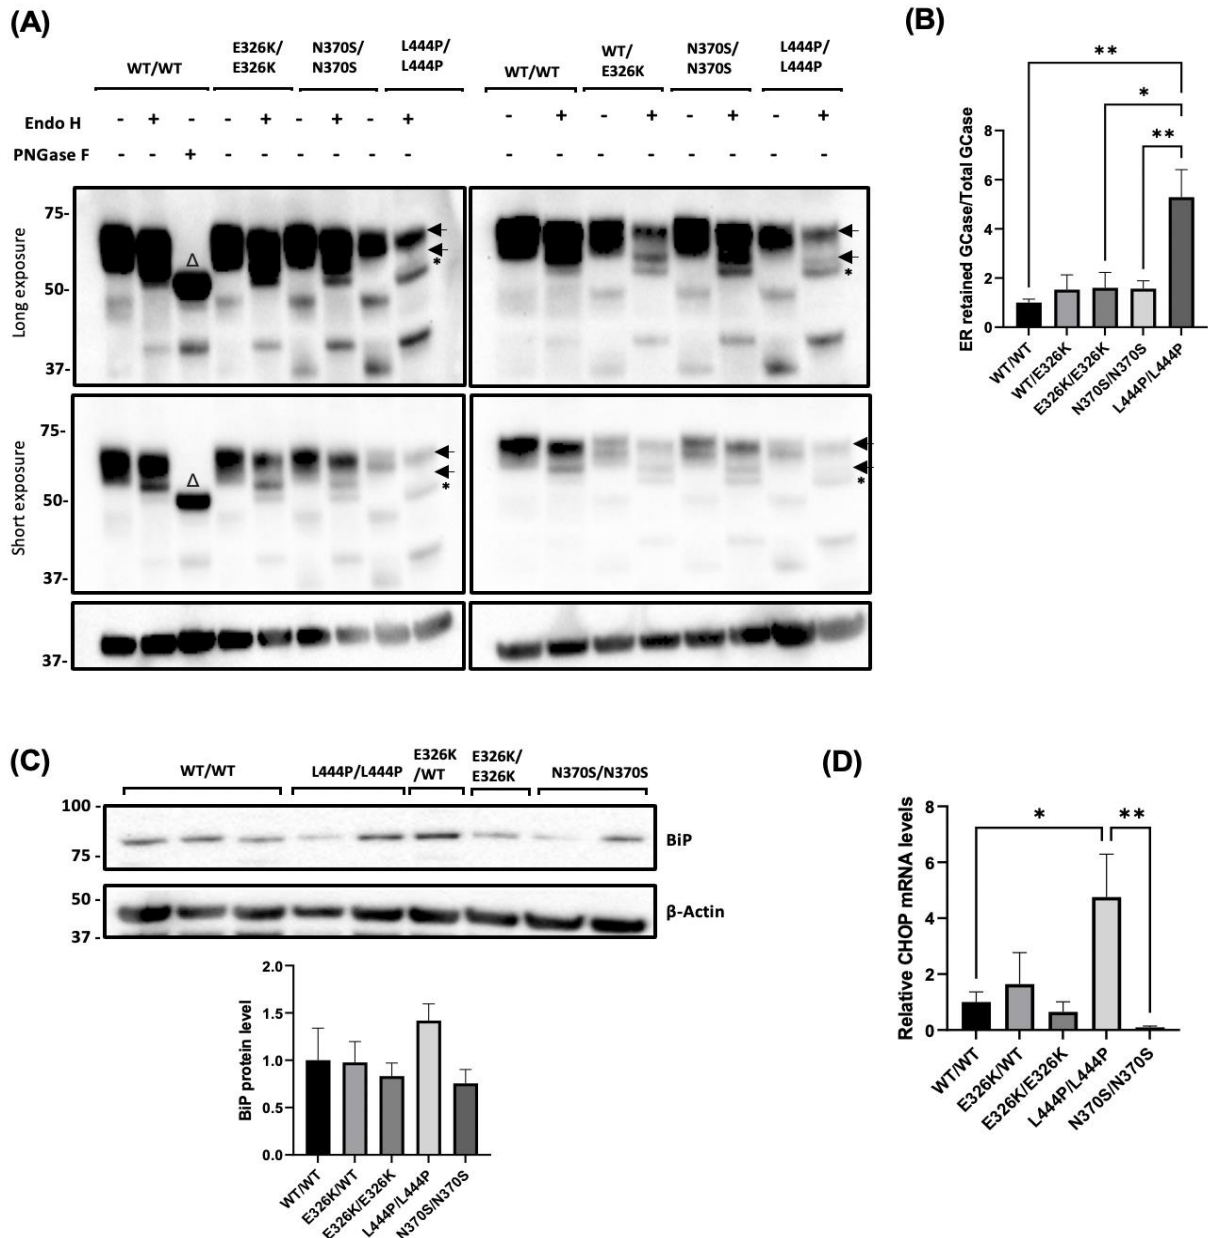

**Figure 3. ER retention and ER stress in patient-derived fibroblasts.** **(A)** Fibroblast cell lysates (20  $\mu$ g of WT, E326K and N370S mutants and 70  $\mu$ g of L444P mutants) were treated with or without endoglycosidase-H (Endo H) and GCase protein species analysed by Western blot. WT/WT cell lysate (20  $\mu$ g) was treated with Peptide-N-Glycosidase F (PNGase F) as a positive control. Figure shows blots at long and short exposure. The two normal species of GCase detected in fibroblasts are indicated by arrows. An additional lower molecular weight band was observed, indicating ER retained GCase, in L444P/L444P fibroblasts following endo-H treatment (black asterisk). The WT/WT cell line treated with PNGase exhibited a lower molecular weight band, indicating a GCase species with no glycosylation ( $\Delta$ ). **(B)** Quantitative analysis of Endo H digestion displayed as the density of bands for ER resident GCase divided by the density of bands for total GCase protein, normalised to  $\beta$ -actin band density. Data normalised to WT/WT which was set at 1. ER stress was analysed by **(C)** quantifying BiP protein level in fibroblasts. Results are normalized to WT/WT control fibroblasts. **(D)** The expression of *CHOP* mRNA levels in patient fibroblasts was

quantified and normalized to WT/WT controls. For each experiment, two biological replicates were used for each cell line. For quantification, *CHOP* expression for each cell line was calculated, pooled and averaged for each genotype. Graph shows mean and error bars show SEM. Statistical test used was one way ANOVA with Tukey post-hoc analysis (\* $p < 0.05$ , \*\* $p < 0.01$ ;  $n = 3$ ). Raw data can be found at: [10.5281/zenodo.6553597](https://doi.org/10.5281/zenodo.6553597).

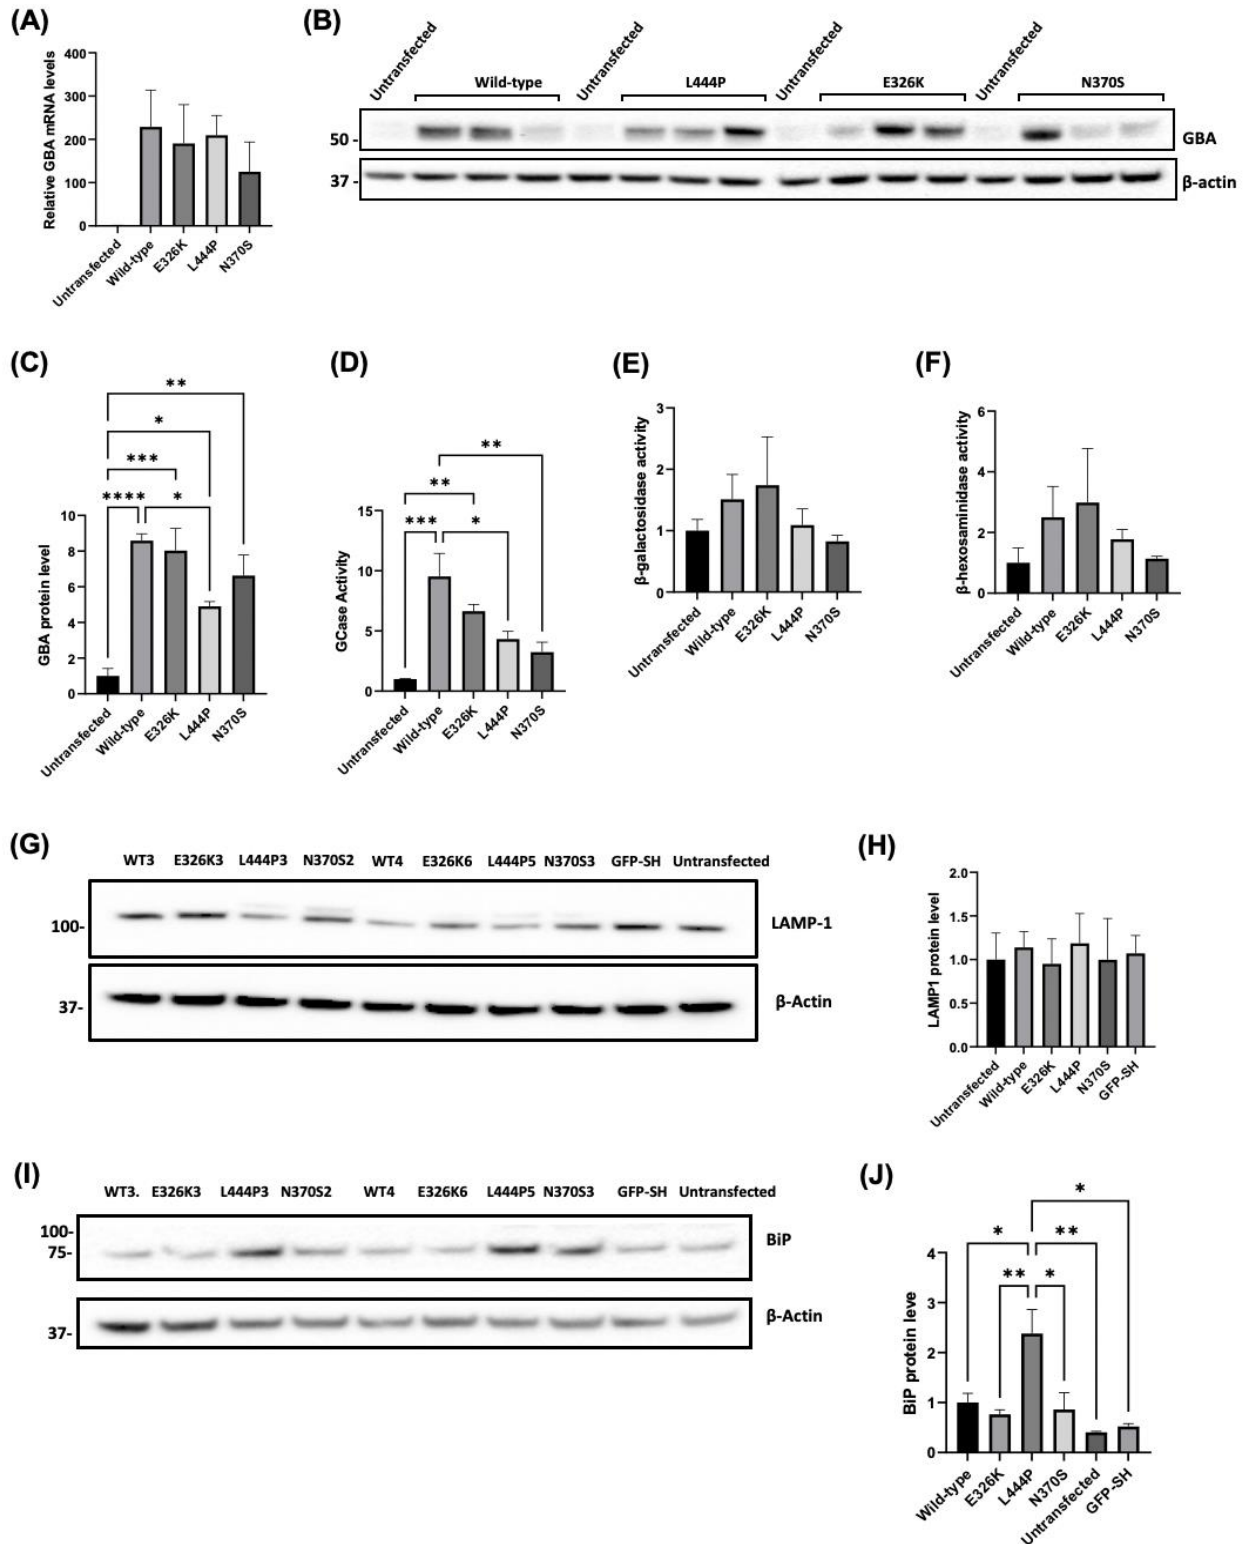

**Figure 4. GBA levels, lysosomal function and ER stress in SH-SY5Y cells over-expressing mutant GCase.** (A) Quantification of GBA mRNA levels in stable SH-SY5Y cell lines, normalised to untransfected SH-SY5Y cells (set at 1). (B) Immunoblot and (C) quantification of GBA protein levels in stable SH-SY5Y cell lines. Data normalised to untransfected SH-SY5Y cells (set at 1). Graphs show mean with SEM. Statistical test used was one-way ANOVA with Tukey's post hoc analysis (\* $p < 0.05$ , \*\* $p < 0.01$ , \*\*\* $p < 0.001$ , \*\*\*\* $p < 0.0001$ ;  $n = 4$ ). (D) GCcase activity in nmole/hr/mg in stable SH-SY5Y cell lines measured at pH 5.4 with NaT and normalised to untransfected SH-



SY5Y cells (set at 1) Graphs show mean with SEM. Statistical test used was one-way ANOVA with Tukey's post hoc analysis (\* $p < 0.05$ , \*\* $p < 0.01$ , \*\*\* $p < 0.001$ ;  $n = 4$ ). The activities of lysosomal hydrolases,  $\beta$ -galactosidase and  $\beta$ -Hexosaminidase were measured at pH 5.1 in SH-SY5Y stable cell lines. **(E)**  $\beta$ -galactosidase activity in nmole/0.5hr/mg in undifferentiated SH-SY5Y clones normalised to untransfected SH-SY5Y cells. **(F)**  $\beta$ -Hexosaminidase activity in nmole/0.5hr/mg measured in undifferentiated SH-SY5Y clones normalised to untransfected SH-SY5Y cells. **(G)** LAMP1 levels were measured via western blot and **(H)** quantified to assess the overall endo-lysosomal content of the SH-SY5Y cell lines. Immunoblot and quantification for LAMP1 protein level in SH-SY5Y stable cell lines. Data normalised to wild-type SH-SY5Y cells ( $n = 3$ ). **(I)** Immunoblot and **(J)** quantification of BiP protein level in SH-SY5Y clones. Data normalised to untransfected SH-SY5Y cells. Graphs show mean with SEM. Statistical test used was one-way ANOVA with Tukey's post hoc analysis(\* $p < 0.05$ . \*\* $p < 0.01$ ;  $n = 3$ ). Raw data can be found at: [10.5281/zenodo.6553597](https://doi.org/10.5281/zenodo.6553597).

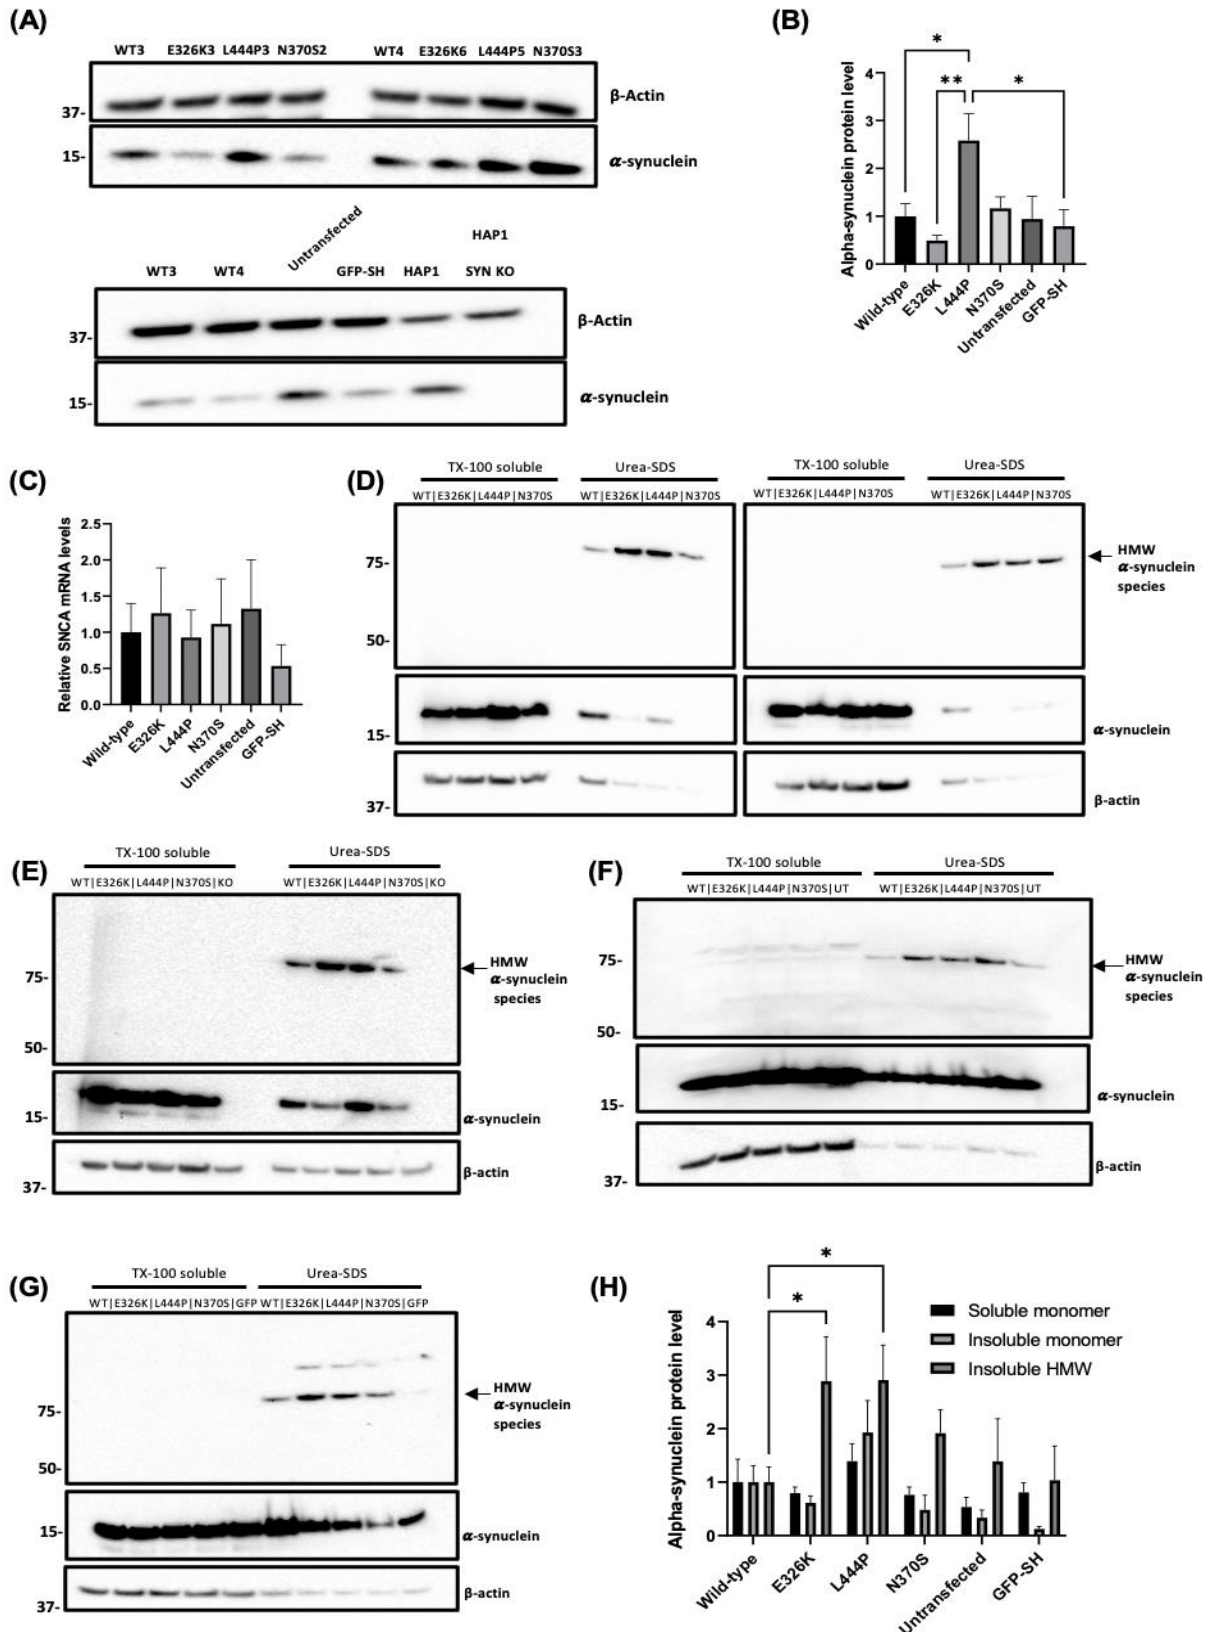

**Figure 5. Soluble and insoluble alpha-synuclein levels in SH-SY5Y stable cell lines expressing mutant *GBA*.** (A) Immunoblot of alpha-synuclein protein level in SH-SY5Y clones. (B) Quantification of alpha-synuclein immunoblotting in SH-SY5Y clones normalised to wild-type clones. (C) Quantification of *SNCA* mRNA levels in SH-SY5Y stable clones normalised to wild-type clones (n=3). TX-100 soluble and

insoluble fractions (urea-SDS) were made from cells and analysed for alpha-synuclein by western blotting. HMW alpha-synuclein species (arrow) were detected in urea-SDS fractions. Monomeric alpha-synuclein was present in the TX-100 soluble fraction and some urea-SDS fractions. **(D)** Immunoblot for all SH-SY5Y cell lines over-expressing mutant *GBA* protein. Appropriate control cell lines were also analysed: **(E)** HAP1 alpha-synuclein knock-out cells (KO); **(F)** untransfected SH-SY5Y cells (UT) and **(G)** GFP over-expressing SH-SY5Y cells (GFP). **(H)** Quantification of soluble and insoluble alpha-synuclein immunoblots. Data normalised to wild-type clones. Ten technical repeats. Graphs show mean with SEM. Statistical test used was one-way ANOVA with Tukey's post hoc analysis or two-way ANOVA with Tukey's post hoc analysis (\* $p < 0.05$ ;  $n = 16$ ). Raw data can be found at: [10.5281/zenodo.6553597](https://zenodo.org/record/6553597).

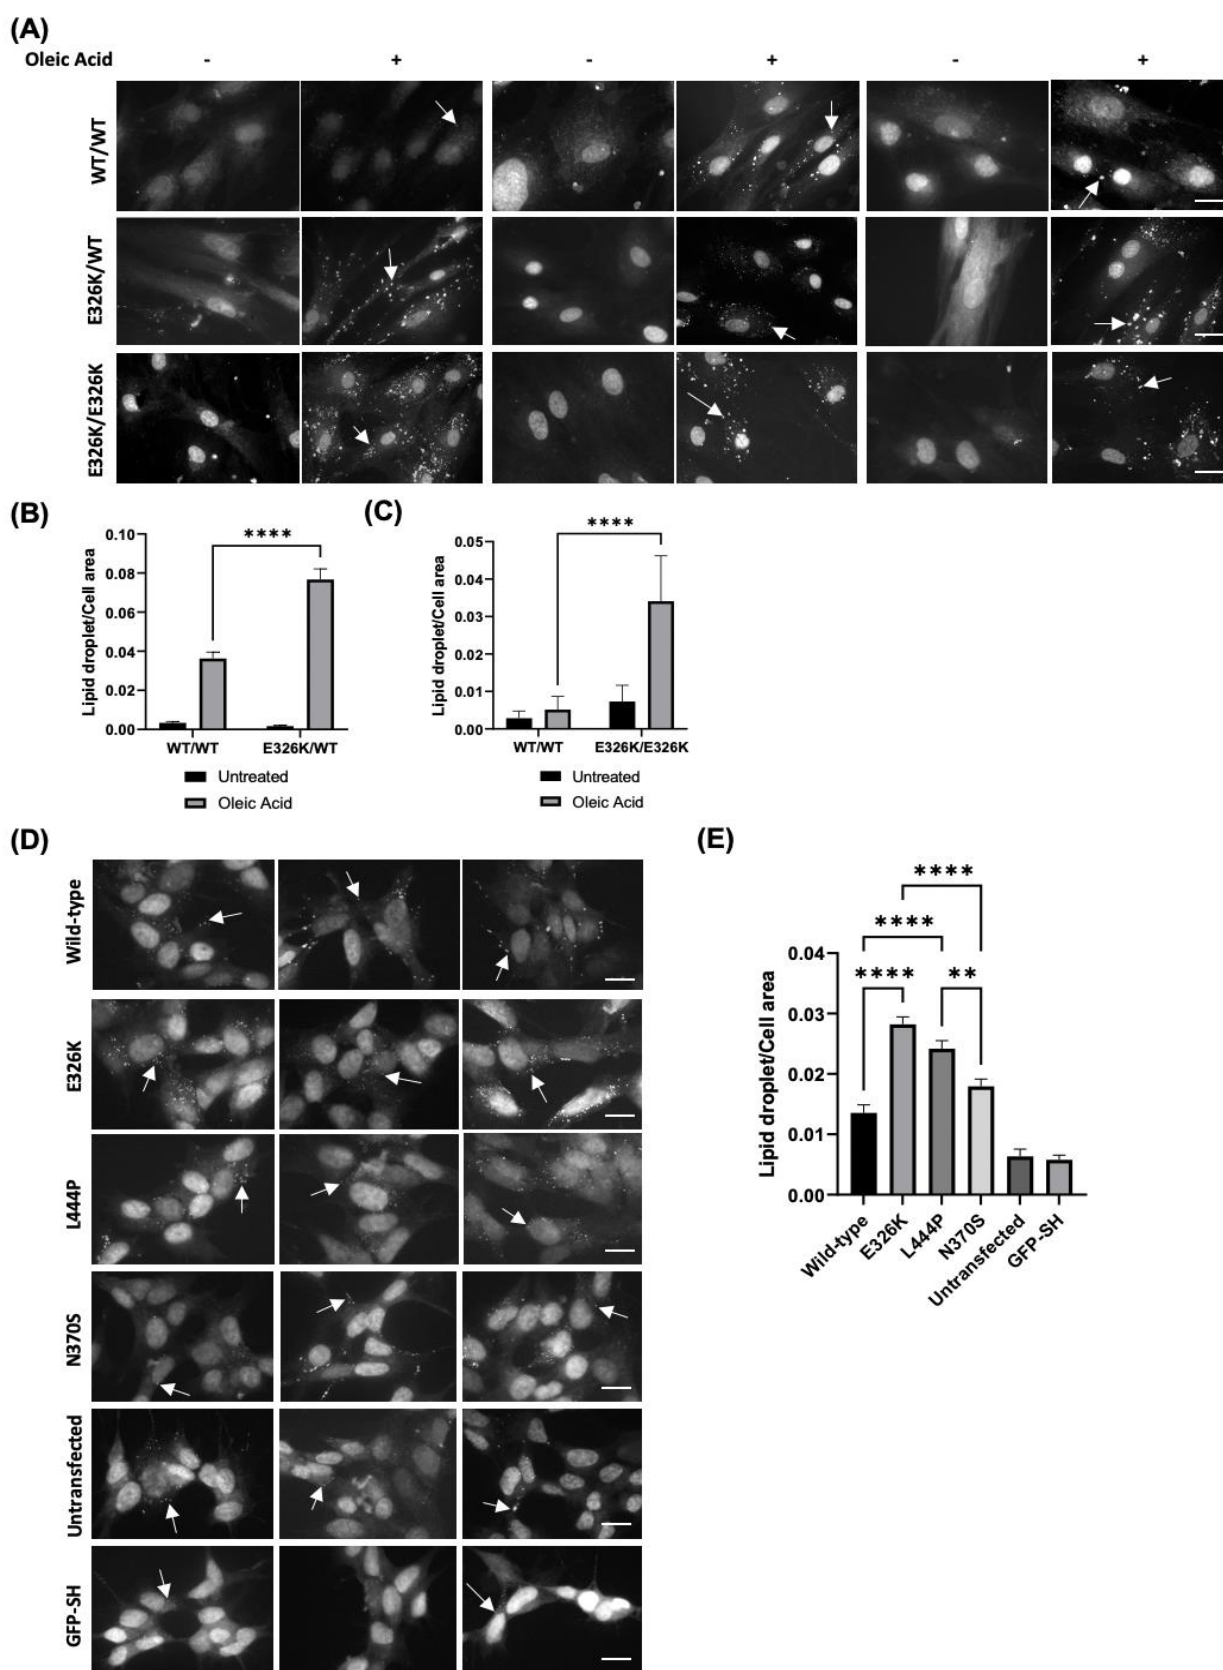

(F)

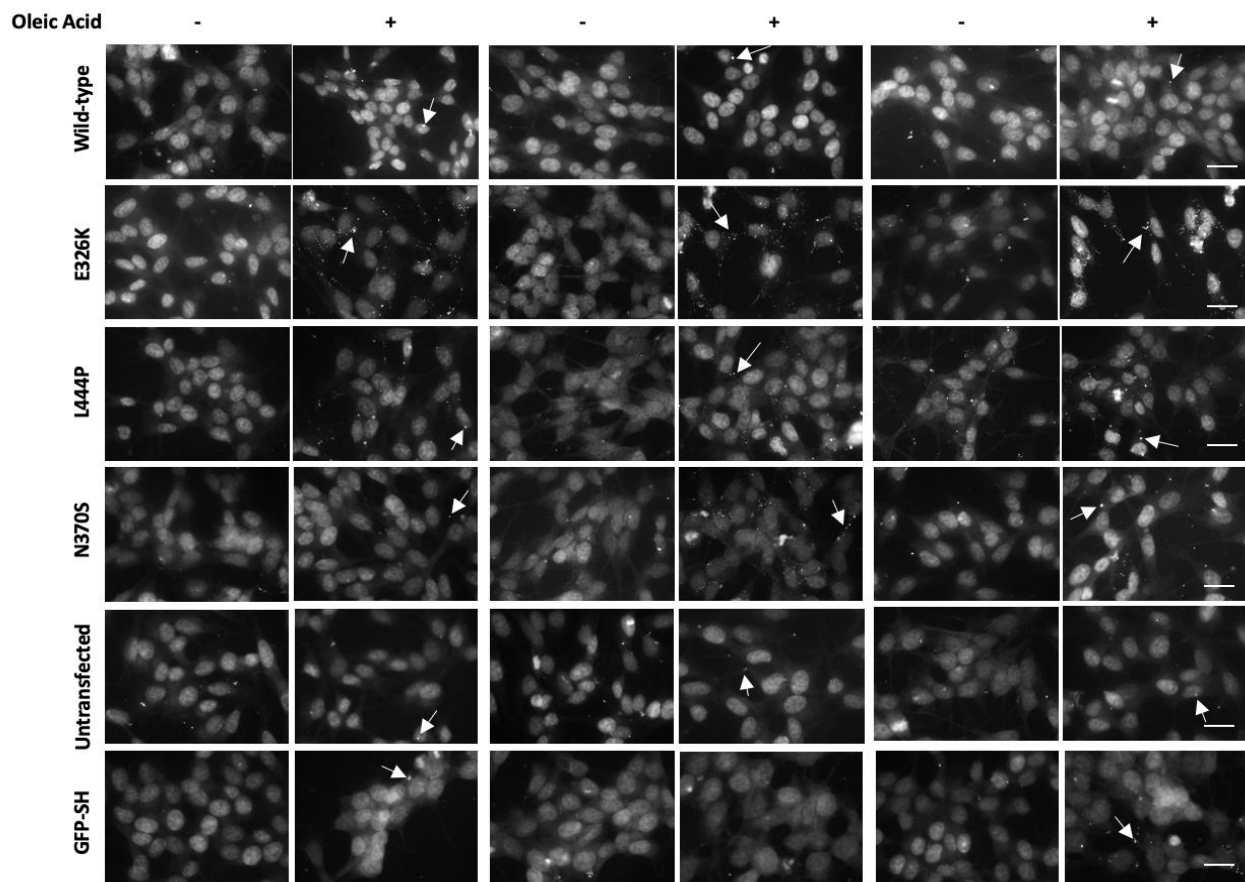

(G)

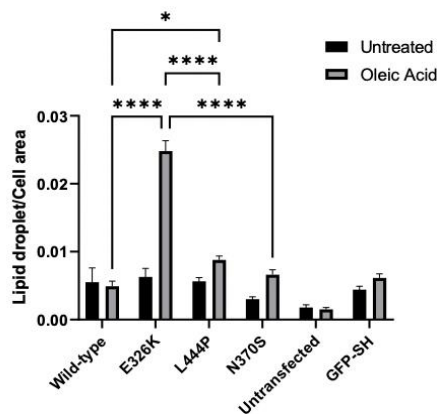

**Figure 6. Lipid droplets in *GBA* mutant cells.** (A) Fibroblast lines harbouring the E326K mutations were starved in Opti-MEM overnight and incubated with and without 100  $\mu$ M oleic acid for 5 hours. Cells were stained with lipophilic fluorescent probe BODIPY 493/503. Lipid droplets present as punctate structures. Three representative images from each genotype shown (-) denotes untreated and (+) denotes treated with oleic acid. All cells were counted in the images and the number of lipid droplets counted and normalised to cell area using ImageJ. Scale bar represents 20  $\mu$ m. Quantification of lipid droplets in (B) control and E326K/+ fibroblasts and (C) control and E326K/E326K fibroblasts displayed as mean with error bars showing SEM. Statistical test used was one-way ANOVA with Tukey post-hoc analysis or two-way ANOVA with Tukey's post-hoc analysis (\*\*\*\* $p$ <0.0001). (D) SH-SY5Y cells over-expressing mutant GCase protein were grown on coverslips and stained with lipophilic

fluorescent probe BODIPY 493/503. Lipid droplets present as punctate structures. Three representative images from each genotype shown. All cells were counted in the images and the number of lipid droplets counted and normalised to cell area using ImageJ. **(E)** Quantification of lipid droplets per cell area shown as mean with SEM. Statistical test used was one-way ANOVA with Tukey post-hoc analysis or two-way ANOVA with Tukey's post-hoc analysis (\*\* $p < 0.01$ ; \*\*\*\* $p < 0.0001$ ). **(F)** SH-SY5Y cells over-expressing mutant GCase protein were starved in Opti-MEM overnight and incubated with and without 100  $\mu\text{M}$  oleic acid for 5 hours. Cells were stained with lipophilic fluorescent probe BODIPY 493/503. Lipid droplets present as punctate structures. Three representative images from each genotype shown (-) denotes untreated and (+) denotes treated with oleic acid. All cells were counted in the images and the number of lipid droplets counted and normalised to cell area using ImageJ. **(G)** Quantification of lipid droplets per cell area displayed as mean with error bars showing SEM. Statistical test used was one-way ANOVA with Tukey post-hoc analysis or two-way ANOVA with Tukey's post-hoc analysis (\* $p < 0.05$ ; \*\*\*\* $p < 0.0001$ ). Scale bar represents 20  $\mu\text{m}$ . Raw data can be found at: [10.5281/zenodo.6553597](https://zenodo.org/record/6553597).

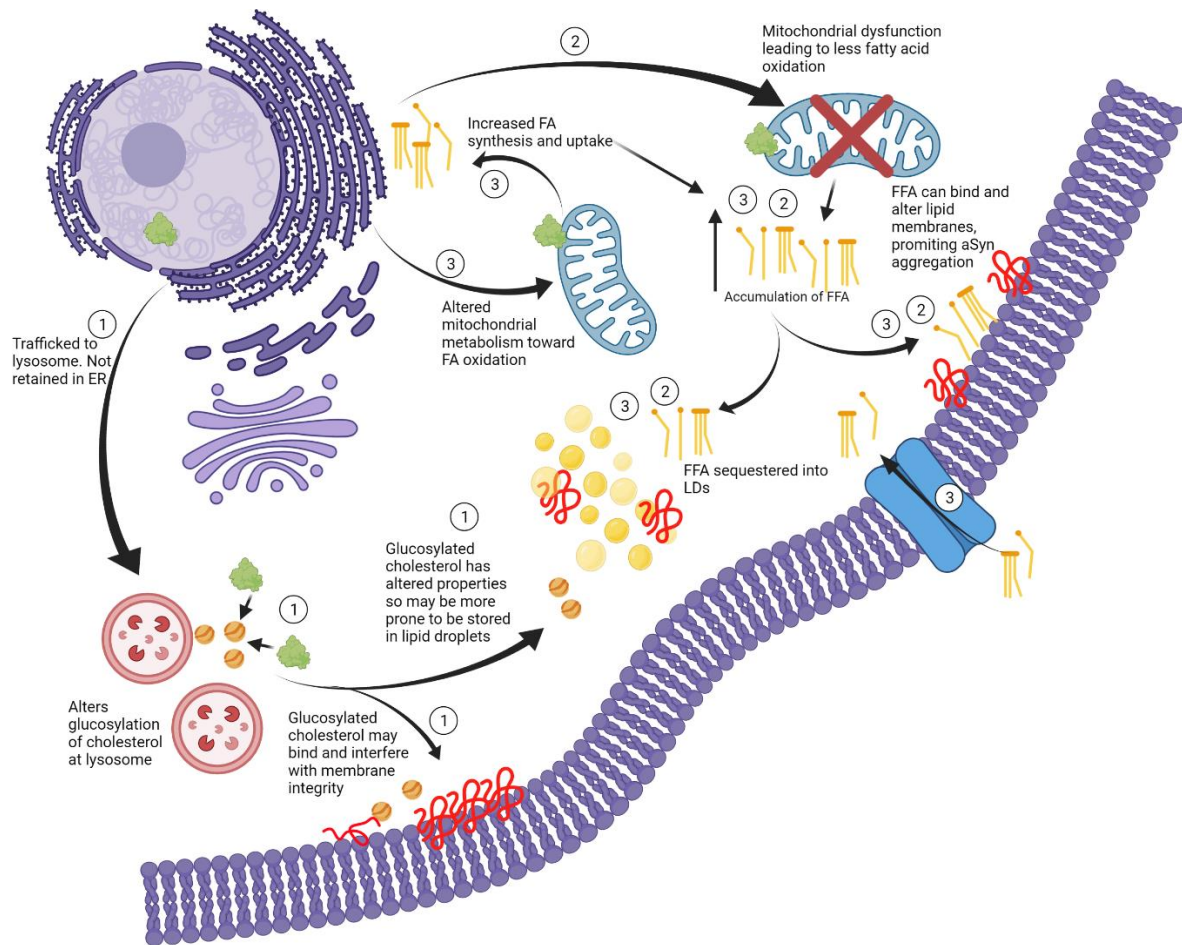

**Figure 7. Proposed mechanisms underlying E326K GCase pathology. (1)** E326K GCase is likely not retained in the ER and is trafficked to the lysosome. At the lysosome GCase carries out its ‘moonlighting’ function of glucosylating cholesterol. E326K GCase may have increased or decreased ability to glucosylate cholesterol, which alters the properties of accumulated cholesterol. This cholesterol can interfere with lipid membranes, altering lipid composition, and promoting alpha-synuclein aggregation. This cholesterol has altered properties so may be more prone to storage in to lipid droplets, leading to an accumulation of lipid droplets. Lipid droplets can act as a site to bind alpha-synuclein, and in high concentrations and under pathological conditions alpha-synuclein may aggregate at lipid droplets. **(2)** The E326K GCase mutation may lead to dysfunctional mitochondria, potentially through impaired clearance. These dysfunctional mitochondria may have reduced ability to metabolise fatty acids, leading to the accumulation of free fatty acids in the neuron. Free fatty acids are capable of interfering with lipid membranes, potentially promoting alpha-synuclein aggregation. Free fatty acids are also sequestered into lipid droplets, as the neuron attempts to protect the cell from lipotoxicity. **(3)** The E326K mutation may cause a shift in the mitochondria’s metabolism capacity, shifting away from glycolysis toward fatty acid oxidation to provide energy for the neuron. In order to meet the demand for fatty acids, the neuron may be more primed to synthesise fatty acids or take up external fatty acids. This may lead to an accumulation of free fatty acids in the neuron, which can exert lipotoxic effects, accumulate in lipid droplets and may induce alpha-synuclein aggregation.

## **Abbreviations**

Parkinson disease - PD

Glucocerebrosidase - GCase

Endoplasmic reticulum - ER

GBA mutation-associated Parkinson disease - GBA-PD

Glucosylceramide - GlcCer

Glucosylsphingosine - GlcSph

Gaucher disease - GD

Autophagic-lysosomal pathway - ALP

Unfolded protein response - UPR

Reactive oxygen species - ROS

Dulbecco's modified eagle media - DMEM

Foetal bovine serum - FBS

Non-essential amino acids - NEAA

Phosphate buffered saline - PBS

Electro-chemi-luminescence - ECL

Conduritol-B-epoxide - CBE

Oleic acid - OA

standard error of the mean - SEM
